# Supplementary material for: Using Mediation Analysis to Understand How Treatments for Paediatric Pain Work: A Systematic Review and Recommendations for Future Research
Source: PubMed Central journal article supplement (PMC7919827; doi:10.3390/children8020147), 2021-02-16
Supplement: children-08-00147-s001.pdf [file children-08-00147-s001.pdf]

## **Supplemental Online Content**

Leake, HB, Moseley, GL, Stanton, TR, Heathcote, LC, Pate, JW, Wewege, MA, Lee, H.

Using mediation analysis to understand how treatments for paediatric pain work: A systematic review and recommendations for future research

**Supplementary Table S1.** Deviations from pre-registered protocol.

**Supplementary Table S2.** Complete search strategies for electronic databases.

**Supplementary Table S3.** Reasons for exclusion of full text articles.

**Supplementary Table S4.** Summary of mediation analyses using parent-reported outcomes.

**Supplementary Table S5.** Results of mediation analyses using parent-reported outcomes.

**Supplementary Table S6.** Justifications of study quality assessment.

**Supplementary Table S7.** Findings of mediation analyses of included studies.

### **eReferences**

This supplementary material has been provided by the authors to give readers additional information about their work.

**Supplementary Table S1** Deviations from pre-registered protocol

| <b>Date</b> | <b>Section</b>                              | <b>Original protocol</b>                                                                                                                            | <b>Revised protocol</b>                                                                                                                                                     | <b>Rationale</b>                                                                                                                |
|-------------|---------------------------------------------|-----------------------------------------------------------------------------------------------------------------------------------------------------|-----------------------------------------------------------------------------------------------------------------------------------------------------------------------------|---------------------------------------------------------------------------------------------------------------------------------|
| 11/12/2019  | Quality assessment                          | Reviewers will appraise methodological quality of studies using a critical appraisal tool for mediation studies developed by Mansell et al. (2013). | Reviewers will appraise methodological quality of studies using a framework of recommendations adapted from Vo et al. (2020).                                               | Study published since date protocol was registered, provides a quality assessment tool that is more relevant than the original. |
| 22/04/2020  | Grouping of studies for narrative synthesis | No description of grouping studies in data synthesis                                                                                                | We will group studies based on duration of pain, either as acute pain (less than 3 months duration) or chronic pain (three months or long duration) (Merskey et al., 1994). | This decision reflects the assumption that the mechanisms of treatment effect may depend on pain duration.                      |

**Supplementary Table S2.** Complete search strategies for electronic databases.

**MEDLINE (OvidSP)**

- 1        mediat\*.mp.
- 2        structural equation model?ing.mp.
- 3        (Baron and Kenny).mp.
- 4        product of coefficient.mp.
- 5        difference in coefficient.mp.
- 6        process of change.mp.
- 7        causal pathway.mp.
- 8        indirect effect.mp.
- 9        process variable.mp.
- 10       (process adj2 evaluation).mp.
- 11       1 or 2 or 3 or 4 or 5 or 6 or 7 or 8 or 9 or 10
- 12       exp pain/
- 13       fibromyalgia/
- 14       juvenile idiopathic arthritis/
- 15       exp Complex Regional Pain Syndromes/
- 16       migraine disorders/
- 17       exp headache disorders/
- 18       Irritable Bowel Syndrome/
- 19       (pain\* or fibromyalgia\* or crps or head?ache\* or migraine\* or cephalgi\* or  
stomach?ache\* or tummy?ache\* or abdominal?ache\* or belly?ache\* or "irritable  
bowel syndrome" or arthralgia or (juvenile adj2 arthrit\*)).mp.
- 20       12 or 13 or 14 or 15 or 16 or 17 or 18 or 19
- 21       exp Child/
- 22       Adolescent/
- 23       Pediatrics/
- 24       (Child\* or adolescen\* or juvenil\* or teen\* or p?ediatric\* or youth\* or "young  
person\*" or "young adult\*").mp.
- 25       21 or 22 or 23 or 24
- 26       11 and 20 and 25
- 27       limit 26 to humans
- 28       limit 26 to animals
- 29       26 not 28
- 30       27 or 29

## EMBASE (OvidSP)

- 1 mediat\*.mp.
- 2 "structural equation model?ing".mp.
- 3 (Baron and Kenny).mp.
- 4 product of coefficient.mp.
- 5 difference in coefficient.mp.
- 6 process of change.mp.
- 7 causal pathway.mp.
- 8 indirect effect.mp.
- 9 process variable.mp.
- 10 (process adj2 evaluation).mp.
- 11 1 or 2 or 3 or 4 or 5 or 6 or 7 or 8 or 9 or 10
- 12 exp pain/
- 13 fibromyalgia/
- 14 exp juvenile idiopathic arthritis/
- 15 exp complex regional pain syndrome/
- 16 exp migraine/
- 17 Headache/
- 18 irritable colon/  
(pain\* or fibromyalgia\* or crps or head?ache\* or migraine\* or cephalgi\* or  
19 stomach?ache\* or tummy?ache\* or abdominal?ache\* or belly?ache\* or "irritable  
bowel syndrome" or arthralgia or (juvenile adj2 arthrit\*)).mp.
- 20 12 or 13 or 14 or 15 or 16 or 17 or 18 or 19
- 21 exp child/
- 22 exp adolescent/
- 23 pediatrics/  
(Child\* or adolescen\* or juvenil\* or teen\* or p?ediatric\* or youth\* or "young  
24 person\*" or "young adult\*").mp.
- 25 21 or 22 or 23 or 24
- 26 11 and 20 and 25
- 27 limit 26 to humans
- 28 limit 26 to animals
- 29 26 not 28
- 30 27 or 29

## PsycINFO (OvidSP)

- 1 mediat\*.mp.
- 2 structural equation model?ing.mp.
- 3 (Baron and Kenny).mp.
- 4 product of coefficient.mp.
- 5 difference in coefficient.mp.
- 6 process of change.mp.
- 7 causal pathway.mp.
- 8 indirect effect.mp.
- 9 process variable.mp.
- 10 (process adj2 evaluation).mp.
- 11 1 or 2 or 3 or 4 or 5 or 6 or 7 or 8 or 9 or 10
- 12 exp pain/
- 13 fibromyalgia/
- 14 exp arthritis/
- 15 exp "complex regional pain syndrome (type i)"/
- 16 exp headache/
- 17 irritable bowel syndrome/  
(pain\* or fibromyalgia\* or crps or head?ache\* or migraine\* or cephalgi\* or  
18 stomach?ache\* or tummy?ache\* or abdominal?ache\* or belly?ache\* or "irritable  
bowel syndrome" or arthralgia or (juvenile adj2 arthrit\*)).mp.
- 19 12 or 13 or 14 or 15 or 16 or 17 or 18
- 20 pediatrics/  
(Child\* or adolescen\* or juvenil\* or teen\* or p?ediatric\* or youth\* or "young  
21 person\*" or "young adult\*").mp.
- 22 20 or 21
- 23 11 and 19 and 22
- 24 limit 23 to human
- 25 limit 23 to animal
- 26 23 not 25
- 27 24 or 26

## Emcare (OvidSP)

- 1 mediat\*.mp.
- 2 structural equation model?ing.mp.
- 3 (Baron and Kenny).mp.
- 4 product of coefficient.mp.
- 5 difference in coefficient.mp.
- 6 process of change.mp.
- 7 causal pathway.mp.
- 8 indirect effect.mp.
- 9 process variable.mp.
- 10 (process adj2 evaluation).mp.
- 11 1 or 2 or 3 or 4 or 5 or 6 or 7 or 8 or 9 or 10
- 12 exp pain/
- 13 fibromyalgia/
- 14 exp juvenile rheumatoid arthritis/
- 15 exp complex regional pain syndrome/
- 16 irritable colon/  
(pain\* or fibromyalgia\* or crps or head?ache\* or migraine\* or cephalgi\* or  
17 stomach?ache\* or tummy?ache\* or abdominal?ache\* or belly?ache\* or "irritable  
bowel syndrome" or arthralgia or (juvenile adj2 arthrit\*)).mp.
- 18 12 or 13 or 14 or 15 or 16 or 17
- 19 exp child/
- 20 exp adolescent/
- 21 pediatrics/  
(Child\* or adolescen\* or juvenil\* or teen\* or p?ediatric\* or youth\* or "young  
22 person\*" or "young adult\*").mp.
- 23 19 or 20 or 21 or 22
- 24 11 and 18 and 23
- 25 limit 24 to human
- 26 limit 24 to animal
- 27 24 not 26
- 28 25 or 27

## Cochrane Central Register of Controlled Trials (CENTRAL)

- 1       mediat\*
  - 2       structural equation modelling
  - 3       structural equation modeling
  - 4       Baron and Kenny
  - 5       product of coefficient
  - 6       difference in coefficient
  - 7       process of change
  - 8       casual pathway
  - 9       indirect effect
  - 10      process variable
  - 11      process NEAR/2 evaluation
  - 12      #1 OR #2 OR #3 OR #4 OR #5 OR #6 OR #7 #9 OR #10 OR #11
  - 13      MeSH descriptor: [Pain] explode all trees
  - 14      MeSH descriptor: [Fibromyalgia] explode all trees
  - 15      MeSH descriptor: [Arthritis, Juvenile] explode all trees
  - 16      MeSH descriptor: [Complex Regional Pain Syndromes] explode all trees
  - 17      MeSH descriptor: [Headache Disorders] explode all trees
  - 18      MeSH descriptor: [Irritable Bowel Syndrome] explode all trees
  - 19      (pain\* or fibromyalgia\* or crps or head?ache\* or migraine\* or cephalgi\* or stomach\*ache\* or tummy\*ache\* or abdominal\*ache\* or belly\*ache\* or "irritable bowel syndrome" or arthralgia or (juvenile NEAR/2 arthrit\*))
  - 20      #13 OR #14 OR #15 OR #16 OR #17 OR #19
  - 21      MeSH descriptor: [Child] explode all trees
  - 22      MeSH descriptor: [Adolescent] explode all trees
  - 23      MeSH descriptor: [Pediatrics] explode all trees
  - 24      (Child\* or adolescen\* or juvenil\* or teen\* or p\*ediatic\* or youth\* or "young person" or "young adult")
  - 25      #21 OR #22 OR #24
  - 26      #12 AND #20 AND #25
- Limit to *Trials*

**Supplementary Table S3.** Reasons for exclusion of full text articles [ordered alphabetically by first author]. Full references are provided in eReferences.

| <b>Study</b>               | <b>Reason for exclusion</b>                         |
|----------------------------|-----------------------------------------------------|
| Absoud et al. (2017)       | Study population did not have pain at baseline      |
| Allantaz et al. (2007)     | Study design was irrelevant to this review          |
| Allen et al. (1998)        | No statistical test for mediation performed         |
| Allison et al. (2016)      | Participants not paediatric (3-18 years)            |
| Altieri et al. (2020)      | No statistical test for mediation performed         |
| Anand et al. (2011)        | Participants not paediatric (3-18 years)            |
| Angst et al. (2012)        | Participants not paediatric (3-18 years)            |
| Atlas et al. (2014)        | Participants not paediatric (3-18 years)            |
| Baccini et al. (2017)      | Participants not paediatric (3-18 years)            |
| Baildam et al. (2013)      | No statistical test for mediation performed         |
| Barber et al. (1977)       | Participants not paediatric (3-18 years)            |
| Barlow et al. (2014)       | Study design was irrelevant to this review          |
| Beal et al. (2020)         | Does not investigate the effects of an intervention |
| Bentley et al. (2005)      | Participants not paediatric (3-18 years)            |
| Blackwell et al. (2012)    | Study design was irrelevant to this review          |
| Bonnert et al. (2017)      | Study design was irrelevant to this review          |
| Bowers et al. (2016)       | Study design was irrelevant to this review          |
| Brennan et al. (1991)      | Participants not paediatric (3-18 years)            |
| Brown et al. (2019)        | Study design was irrelevant to this review          |
| Brown et al. (2012)        | No statistical test for mediation performed         |
| Brunner et al. (2012)      | No statistical test for mediation performed         |
| Bryskin et al. (2015)      | No statistical test for mediation performed         |
| Buenaver et al. (2012)     | Study design was irrelevant to this review          |
| Caixeta et al. (2020)      | No statistical test for mediation performed         |
| Cakar Turhan et al. (2015) | No statistical test for mediation performed         |
| Cappucci et al. (2015)     | Study design was irrelevant to this review          |
| Castien et al. (2013)      | Participants not paediatric (3-18 years)            |
| Chan et al. (2017)         | Study design was irrelevant to this review          |

|                              |                                             |
|------------------------------|---------------------------------------------|
| Chou et al. (2011)           | Participants not paediatric (3-18 years)    |
| Christidis et al. (2015)     | Participants not paediatric (3-18 years)    |
| Clementi et al. (2020)       | Does not compare two or more groups         |
| Conti et al. (2020)          | Participants not paediatric (3-18 years)    |
| Corinaldesi et al. (2009)    | Participants not paediatric (3-18 years)    |
| Cunningham et al. (2020)     | No statistical test for mediation performed |
| Dekker et al. (2016)         | Study design was irrelevant to this review  |
| DiVasta et al. (2015)        | No statistical test for mediation performed |
| Du et al. (2018)             | No statistical test for mediation performed |
| Dura-Ferrandis et al. (2017) | Participants not paediatric (3-18 years)    |
| Essner (2013)                | Study design was irrelevant to this review  |
| Evans et al. (2014)          | Study design was irrelevant to this review  |
| Evans et al. (2011)          | No statistical test for mediation performed |
| Evans et al. (2017)          | Study design was irrelevant to this review  |
| Evans et al. (2016)          | Study design was irrelevant to this review  |
| Evans et al. (2006)          | Study design was irrelevant to this review  |
| Fales et al. (2020)          | No intervention                             |
| Ferrari et al. (2010)        | Participants not paediatric (3-18 years)    |
| Field et al. (2020)          | No statistical test for mediation performed |
| Finch et al. (2009)          | Participants not paediatric (3-18 years)    |
| Fiorelli et al. (2010)       | Participants not paediatric (3-18 years)    |
| Fisher et al. (2016)         | Does not compare two or more groups         |
| Forsythe et al. (2011)       | Study design was irrelevant to this review  |
| Foxen-Craft (2017)           | Study design was irrelevant to this review  |
| Garland et al. (2012)        | Participants not paediatric (3-18 years)    |
| Gaultney (2020)              | Study design was irrelevant to this review  |
| Ghorbani et al. (2020)       | Participants not paediatric (3-18 years)    |
| Gillis (2002)                | Study design was irrelevant to this review  |
| Glenn et al. (2014)          | Study design was irrelevant to this review  |
| Gomez-Mancilla et al. (2001) | Participants not paediatric (3-18 years)    |

|                                  |                                                                         |
|----------------------------------|-------------------------------------------------------------------------|
| Gottschlich et al. (2011)        | No statistical test for mediation performed                             |
| Grinsvall et al. (2015)          | Study design was irrelevant to this review                              |
| Vos et al. (2017)                | Participants not paediatric (3-18 years)                                |
| Harel et al. (2004)              | No statistical test for mediation performed                             |
| Harper et al. (2012)             | Study design was irrelevant to this review                              |
| Hashish et al. (1988)            | Participants not paediatric (3-18 years)                                |
| He et al. (2015)                 | Study design was irrelevant to this review                              |
| Hechler et al. (2010)            | No statistical test for mediation performed                             |
| Heeney et al. (2016a)            | No statistical test for mediation performed                             |
| Heeney et al. (2018)             | Study design was irrelevant to this review                              |
| Heeney et al. (2016b)            | No statistical test for mediation performed                             |
| Herroeder et al. (2007)          | Participants not paediatric (3-18 years)                                |
| Hildenbrand et al. (2020)        | Independent variable in the mediation analysis was not the intervention |
| Hillgrove-Stuart et al. (2013)   | Participants not paediatric (3-18 years)                                |
| Hilt (2009)                      | Study design was irrelevant to this review                              |
| Hind et al. (2017)               | No statistical test for mediation performed                             |
| Hooke et al. (2018)              | Does not compare two or more groups                                     |
| Hoyeraal et al. (1978)           | No statistical test for mediation performed                             |
| Ingelmo et al. (2007)            | No statistical test for mediation performed                             |
| Janssens et al. (2014)           | Does not compare two or more groups                                     |
| Jones et al. (2018)              | Study design was irrelevant to this review                              |
| Jonsbu et al. (2011)             | Participants not paediatric (3-18 years)                                |
| Junghans-Rutelonis et al. (2018) | Independent variable in the mediation analysis was not the intervention |
| Khayat et al. (2015)             | Participants not paediatric (3-18 years)                                |
| Kilkens et al. (2005)            | Participants not paediatric (3-18 years)                                |
| Kobayashi et al. (2017)          | Study design was irrelevant to this review                              |
| Kościelniak-Merak et al. (2020)  | No statistical test for mediation performed                             |
| Lai et al. (2019)                | No statistical test for mediation performed                             |

|                          |                                             |
|--------------------------|---------------------------------------------|
| Langer et al. (2014)     | Study design was irrelevant to this review  |
| Langer et al. (2013)     | Study design was irrelevant to this review  |
| Lee et al. (2020)        | No statistical test for mediation performed |
| Leeuw et al. (2008)      | Participants not paediatric (3-18 years)    |
| Levy et al. (2012)       | Study design was irrelevant to this review  |
| Lewis et al. (1996)      | Study design was irrelevant to this review  |
| Li et al. (2016)         | Participants not paediatric (3-18 years)    |
| Lim et al. (2019)        | Study design was irrelevant to this review  |
| Lioffi et al. (2007)     | Does not compare two or more groups         |
| Lohsiriwat et al. (2004) | Participants not paediatric (3-18 years)    |
| Love et al. (2019)       | Study design was irrelevant to this review  |
| Lowen et al. (2013)      | Participants not paediatric (3-18 years)    |
| Lu et al. (2013)         | Study design was irrelevant to this review  |
| Luciano et al. (2014)    | Participants not paediatric (3-18 years)    |
| Lustig et al. (1996)     | Study design was irrelevant to this review  |
| Maddison et al. (2006)   | Participants not paediatric (3-18 years)    |
| Malattia et al. (2020)   | No statistical test for mediation performed |
| McGarrigle et al. (2018) | Study design was irrelevant to this review  |
| Meier et al. (2009)      | No statistical test for mediation performed |
| Melzack et al. (1980a)   | Participants not paediatric (3-18 years)    |
| Melzack et al. (1980b)   | Participants not paediatric (3-18 years)    |
| Miller et al. (2017)     | Study design was irrelevant to this review  |
| Milling et al. (2006)    | Participants not paediatric (3-18 years)    |
| Milling et al. (2007)    | Participants not paediatric (3-18 years)    |
| Mohammed et al. (2010)   | Study design was irrelevant to this review  |
| Moore et al. (1992)      | Participants not paediatric (3-18 years)    |
| Mulroy et al. (2011)     | No statistical test for mediation performed |
| Neville et al. (2020)    | No intervention                             |
| Nickel et al. (2012)     | Participants not paediatric (3-18 years)    |
| Niedermann et al. (2011) | Participants not paediatric (3-18 years)    |

|                                 |                                                                         |
|---------------------------------|-------------------------------------------------------------------------|
| Noel et al. (2015)              | Does not compare two or more groups                                     |
| Noel et al. (2018)              | Study design was irrelevant to this review                              |
| Palermo et al. (2018)           | Study design was irrelevant to this review                              |
| Palstam et al. (2016)           | Participants not paediatric (3-18 years)                                |
| Pavlova et al. (2017)           | Study design was irrelevant to this review                              |
| Pavlova et al. (2018)           | Study design was irrelevant to this review                              |
| Pavlova et al. (2020)           | Does not investigate the effects of an intervention                     |
| Peatfield et al. (1983)         | Participants not paediatric (3-18 years)                                |
| Petter et al. (2014)            | Independent variable in the mediation analysis was not the intervention |
| Peugh et al. (2017)             | Study design was irrelevant to this review                              |
| Poppert Cordts et al. (2019)    | Study design was irrelevant to this review                              |
| Posner (1999)                   | Study design was irrelevant to this review                              |
| Pringsheim et al. (2002)        | Participants not paediatric (3-18 years)                                |
| Puzino et al. (2018)            | Study design was irrelevant to this review                              |
| Quispe-Cabanillas et al. (2012) | Participants not paediatric (3-18 years)                                |
| Randall et al. (2020)           | Does not compare two or more groups                                     |
| Reddy et al. (2020)             | No statistical test for mediation performed                             |
| Reed-Knight et al. (2018)       | Study design was irrelevant to this review                              |
| Reid (2003)                     | Study design was irrelevant to this review                              |
| Reme et al. (2011)              | Participants not paediatric (3-18 years)                                |
| Riggenbach et al. (2020)        | Study design was irrelevant to this review                              |
| Robinson et al. (2013)          | Study design was irrelevant to this review                              |
| Rolli Salathe et al. (2020)     | Does not investigate the effects of an intervention                     |
| Ruperte et al. (2011)           | No statistical test for mediation performed                             |
| Ruperto et al. (2013)           | No statistical test for mediation performed                             |
| Saxe et al. (2006)              | Does not compare two or more groups                                     |
| Schoenen et al. (2013)          | Participants not paediatric (3-18 years)                                |
| Schreiber et al. (2001)         | Participants not paediatric (3-18 years)                                |
| Schurman et al. (2012)          | Study design was irrelevant to this review                              |

|                              |                                             |
|------------------------------|---------------------------------------------|
| Shah et al. (2002)           | No statistical test for mediation performed |
| Shi et al. (2011)            | Participants not paediatric (3-18 years)    |
| Shi et al. (2015)            | Participants not paediatric (3-18 years)    |
| Sieberg et al. (2011)        | Study design was irrelevant to this review  |
| Simister et al. (2018)       | Participants not paediatric (3-18 years)    |
| Slaman et al. (2015)         | Participants not paediatric (3-18 years)    |
| Spinhoven et al. (2004)      | Participants not paediatric (3-18 years)    |
| Stratelak et al. (1996)      | Participants not paediatric (3-18 years)    |
| Taheri et al. (2016)         | Study design was irrelevant to this review  |
| Tarnowski et al. (1987)      | Study design was irrelevant to this review  |
| ter Kuile et al. (1996)      | Participants not paediatric (3-18 years)    |
| Thieme et al. (2015)         | Participants not paediatric (3-18 years)    |
| Tran et al. (2015)           | Study design was irrelevant to this review  |
| Tran (2015)                  | Study design was irrelevant to this review  |
| Tremblay et al. (2010)       | Study design was irrelevant to this review  |
| Troullos et al. (1990)       | Participants not paediatric (3-18 years)    |
| Tsao et al. (2006a)          | Study design was irrelevant to this review  |
| Tsao et al. (2006b)          | Study design was irrelevant to this review  |
| Turner et al. (1995)         | Participants not paediatric (3-18 years)    |
| Tutuncu et al. (2013)        | No statistical test for mediation performed |
| van Tilburg et al. (2017)    | Study design was irrelevant to this review  |
| VanDyck et al. (1991)        | Participants not paediatric (3-18 years)    |
| Varni et al. (2018)          | Study design was irrelevant to this review  |
| Varni et al. (2020)          | Study design was irrelevant to this review  |
| Venkatraghavan et al. (2016) | Participants not paediatric (3-18 years)    |
| VerLee et al. (2012)         | Study design was irrelevant to this review  |
| Wall (2000)                  | Study design was irrelevant to this review  |
| Wallace (2009)               | Study design was irrelevant to this review  |
| Walters et al. (1999)        | Study design was irrelevant to this review  |
| Wand et al. (2013)           | Participants not paediatric (3-18 years)    |

|                      |                                                                  |
|----------------------|------------------------------------------------------------------|
| Wong et al. (2015)   | Participants not paediatric (3-18 years)                         |
| Yang et al. (2017)   | Participants not paediatric (3-18 years)                         |
| Yang et al. (2020)   | Language: not reported in English, Portuguese, Spanish or German |
| Zeidan et al. (2016) | Participants not paediatric (3-18 years)                         |
| Ziadni et al. (2020) | Study design was irrelevant to this review                       |
| Zinman et al. (2005) | Participants not paediatric (3-18 years)                         |

**Supplementary Table S4.** Summary of mediation analyses using parent-reported outcomes.

| Study                 | Intervention vs Comparator                        | Path <i>a</i> (I→M) | Mediator                        | Path <i>b</i> (M→O) | Outcome (Parent-Reported)        | Indirect Effect |
|-----------------------|---------------------------------------------------|---------------------|---------------------------------|---------------------|----------------------------------|-----------------|
| Lalouni et al. (2020) | Exposure-based internet-CBT vs treatment as usual | NR                  | GI-specific avoidance behaviour | NR                  | GI symptoms                      | +               |
|                       |                                                   | NR                  | GI-specific anxiety             | NR                  | GI symptoms                      | +               |
| Levy et al. (2014)    | SLCBT vs education                                | +                   | Perceived pain threat           | +                   | GI symptom severity at 3 months  | -               |
|                       |                                                   | +                   | Perceived pain threat           | +                   | GI symptom severity at 6 months  | -               |
|                       |                                                   | +                   | Perceived pain threat           | +                   | GI symptom severity at 12 months | +               |
|                       |                                                   | +                   | Perceived pain threat           | +                   | Pain intensity at 3 months       | +               |
|                       |                                                   | +                   | Perceived pain threat           | +                   | Pain intensity at 6 months       | +               |
|                       |                                                   | +                   | Perceived pain threat           | -                   | Pain intensity at 12 months      | +               |
|                       |                                                   | +                   | Solicitousness                  | -                   | GI symptom severity at 3 months  | -               |
|                       |                                                   | +                   | Solicitousness                  | -                   | GI symptom severity at 6 months  | -               |
|                       |                                                   | +                   | Solicitousness                  | -                   | GI symptom severity at 12 months | -               |
|                       |                                                   | +                   | Solicitousness                  | -                   | Pain intensity at 3 months       | -               |
|                       |                                                   | +                   | Solicitousness                  | -                   | Pain intensity at 6 months       | -               |
|                       |                                                   | +                   | Solicitousness                  | -                   | Pain intensity at 12 months      | -               |
|                       |                                                   | +                   | Pain catastrophizing            | -                   | GI symptom severity at 3 months  | -               |
|                       |                                                   | +                   | Pain catastrophizing            | -                   | GI symptom severity at 6 months  | -               |
|                       |                                                   | +                   | Pain catastrophizing            | -                   | GI symptom severity at 12 months | -               |
|                       |                                                   | +                   | Pain catastrophizing            | -                   | Pain intensity at 3 months       | -               |
|                       |                                                   | +                   | Pain catastrophizing            | +                   | Pain intensity at 6 months       | -               |
|                       |                                                   | +                   | Pain catastrophizing            | -                   | Pain intensity at 12 months      | -               |

Statistical significance is defined as 95% confidence intervals that do not contain zero. (+): statistically significant association; (-): statistically non-significant association; CBT, Cognitive Behavioral Therapy; I, Intervention; GI, Gastro-Intestinal; M, Mediator; O, Outcome; SLCBT, Social-Learning Cognitive Behavioral Therapy.

**Supplementary Table S5.** Results of mediation analyses using parent-reported outcomes.

| Study                 | Intervention vs Comparator → Mediator (Measure) → Outcome (Measure) <i>Parent-Reported</i>                           | Path a Point Estimate (Error)        | Path b Point Estimate (Error)       | Direct Effect (c') Point Estimate (Error) | Indirect Effect (ab) Point Estimate (Error) | Total effect (c) Point Estimate (Error) | Proportion Mediated |
|-----------------------|----------------------------------------------------------------------------------------------------------------------|--------------------------------------|-------------------------------------|-------------------------------------------|---------------------------------------------|-----------------------------------------|---------------------|
| Lalouni et al. (2021) | Exposure-based internet-CBT vs treatment as usual → GI-avoidance (BRQ-C) → Health-related quality of life (PedQL-GI) | -1.99 (error NR)                     | -0.72 (error NR)                    | 0.36 (error NR)                           | 1.43 (95% CI=0.42, 3.23)                    | 1.71 (error NR)                         | 79.8%               |
|                       | Exposure-based internet-CBT vs treatment as usual → GI-anxiety (VSI-C) → Health-related quality of life (PedQL-GI)   | -1.39 (error NR)                     | -1.13 (error NR)                    | 0.43 (error NR)                           | 1.58 (95% CI=0.43, 3.62)                    | 1.71 (error NR)                         | 78.6%               |
| Levy et al. (2014)    | SLCBT vs education → Parent threat (PBQ) → GI symptom severity (CSI) at 3 months                                     | -0.18 (SE=0.03; 95% CI=-0.24, -0.12) | 0.32 (SE=0.09; 95% CI=0.14, 0.50)   | 0.01 (SE=0.06; 95% CI= -0.11, 0.13)       | -0.06 (SE=0.02; 95% CI=-0.09, 0.02)         | NR                                      | NR                  |
|                       | SLCBT vs education → Parent threat (PBQ) → GI symptom severity (CSI) at 6 months                                     | -0.18 (SE=0.03; 95% CI=-0.24, -0.12) | 0.30 (SE=0.07; 95% CI=0.16, 0.44)   | -0.01 (SE=0.05; 95% CI=-0.11, 0.09)       | -0.05 (SE=0.02; 95% CI=-0.08, 0.02)         | NR                                      | NR                  |
|                       | SLCBT vs education → Parent threat (PBQ) → GI symptom severity (CSI) at 12 months                                    | -0.17 (SE=0.03; 95% CI=-0.23, -0.11) | 0.33 (SE=0.09; 95% CI=0.15, 0.51)   | -0.001 (SE=0.06; 95% CI=-0.12, 0.12)      | -0.06 (SE=0.02; 95% CI=-0.09, -0.02)        | NR                                      | NR                  |
|                       | SLCBT vs education → Parent threat (PBQ) → Pain intensity (FPS-R) at 3 months                                        | -0.18 (SE=0.03; 95% CI=-0.24, -0.12) | 1.26 (SE=0.27; 95% CI=0.73, 1.79)   | -0.02 (SE=0.19; 95% CI=-0.39, 0.35)       | -0.23 (SE=0.06; 95% CI=-0.35, -0.11)        | NR                                      | NR                  |
|                       | SLCBT vs education → Parent threat (PBQ) → Pain intensity (FPS-R) at 6 months                                        | -0.18 (SE=0.03; 95% CI=-0.24, -0.12) | 0.88 (SE=0.29; 95% CI=0.31, 1.45)   | -0.15 (SE=0.20; 95% CI=-0.54, 0.24)       | -0.16 (SE=0.06; 95% CI=-0.27, -0.04)        | NR                                      | NR                  |
|                       | SLCBT vs education → Parent threat (PBQ) → Pain intensity (FPS-R) at 12 months                                       | -0.18 (SE=0.03; 95% CI=-0.24, -0.12) | 0.87 (SE=0.25; 95% CI=-0.38, 1.36)  | 0.24 (SE=0.18; 95% CI=-0.11, 0.59)        | -0.16 (SE=0.05; 95% CI=-0.26, -0.06)        | NR                                      | NR                  |
|                       | SLCBT vs education → Parent solicitousness (ARCS) → GI symptom severity (CSI) at 3 months                            | -0.21 (SE=0.03; 95% CI=-0.27, -0.15) | 0.09 (SE=0.10; 95% CI=-0.11, 0.29)  | 0.01 (SE=0.06; 95% CI=-0.11, 0.13)        | -0.02 (SE=0.02; 95% CI=-0.06, 0.02)         | NR                                      | NR                  |
|                       | SLCBT vs education → Parent solicitousness (ARCS) → GI symptom severity (CSI) at 6 months                            | -0.21 (SE=0.03; 95% CI=-0.26, -0.15) | 0.002 (SE=0.09; 95% CI=-0.17, 0.18) | -0.01 (SE=0.05; 95% CI=-0.11, 0.09)       | -0.0004 (SE=0.02; 95% CI=-0.04, 0.04)       | NR                                      | NR                  |

|                                                                                            |                                      |                                     |                                      |                                       |    |    |
|--------------------------------------------------------------------------------------------|--------------------------------------|-------------------------------------|--------------------------------------|---------------------------------------|----|----|
| SLCBT vs education → Parent solicitousness (ARCS) → GI symptom severity (CSI) at 12 months | -0.21 (0.03; 95% CI=-0.27, -0.15)    | 0.14 (SE=0.11; 95% CI=-0.08, 0.36)  | -0.001 (SE=0.06; 95% CI=-0.12, 0.12) | -0.03 (SE=0.02; 95% CI=-0.08, 0.02)   | NR | NR |
| SLCBT vs education → Parent solicitousness (ARCS) → Pain intensity (FPS-R) at 3 months     | -0.21 (SE=0.03; 95% CI=-0.27, -0.15) | 0.34 (SE=0.32; 95% CI=-0.29, 0.97)  | -0.02 (SE=0.19; 95% CI=-0.39, 0.35)  | -0.07 (SE=0.07; 95% CI=-0.20, 0.06)   | NR | NR |
| SLCBT vs education → Parent solicitousness (ARCS) → Pain intensity (FPS-R) at 6 months     | -0.21 (SE=0.03; 95% CI=-0.27, -0.15) | -0.27 (SE=0.34; 95% CI=-0.94, 0.40) | -0.15 (SE=0.20; 95% CI=-0.54, 0.24)  | 0.06 (SE=0.07; 95% CI=-0.08, 0.20)    | NR | NR |
| SLCBT vs education → Parent solicitousness (ARCS) → Pain intensity (FPS-R) at 12 months    | -0.20 (SE=0.03; 95% CI=-0.26, -0.14) | 0.32 (SE=0.30; 95% CI=-0.27, 0.91)  | 0.24 (SE=0.18; 95% CI=-0.11, 0.59)   | -0.06 (SE=0.06; 95% CI=-0.18, 0.06)   | NR | NR |
| SLCBT vs education → Child catastrophizing (PRI) → GI symptom severity (CSI) at 3 months   | -0.12 (SE=0.05; 95% CI=-0.22, -0.02) | 0.08 (SE=0.07; 95% CI=-0.06, 0.22)  | 0.01 (SE=0.06; 95% CI=-0.11, 0.13)   | -0.01 (SE=0.01; 95% CI=-0.03, 0.01)   | NR | NR |
| SLCBT vs education → Child catastrophizing (PRI) → GI symptom severity (CSI) at 6 months   | -0.12 (SE=0.05; 95% CI=-0.22, -0.02) | -0.01 (SE=0.06; 95% CI=-0.13, 0.11) | -0.01 (SE=0.05; 95% CI=-0.11, 0.09)  | 0.001 (SE=0.01; 95% CI=-0.01, 0.02)   | NR | NR |
| SLCBT vs education → Child catastrophizing (PRI) → GI symptom severity (CSI) at 12 months  | -0.12 (SE=0.05; 95% CI=-0.22, -0.02) | 0.03 (SE=0.07; 95% CI=-0.11, 0.17)  | -0.001 (SE=0.06; 95% CI=-0.12, 0.12) | -0.004 (SE=0.01; 95% CI=-0.02, 0.01)  | NR | NR |
| SLCBT vs education → Child catastrophizing (PRI) → Pain intensity (FPS-R) at 3 months      | -0.12 (SE=0.05; 95% CI=-0.22, -0.02) | 0.37 (SE=0.21; 95% CI=-0.04, 0.78)  | -0.02 (SE=0.19; 95% CI=-0.39, 0.35)  | -0.04 (SE=0.03; 95% CI=-0.11, 0.02)   | NR | NR |
| SLCBT vs education → Child catastrophizing (PRI) → Pain intensity (FPS-R) at 6 months      | -0.12 (SE=0.05; 95% CI=-0.22, -0.02) | 0.03 (SE=0.22; 95% CI=-0.40, 0.46)  | -0.15 (SE=0.20; 95% CI=-0.54, 0.24)  | -0.0004 (SE=0.03, 95% CI=-0.06, 0.05) | NR | NR |
| SLCBT vs education → Child catastrophizing (PRI) → Pain intensity (FPS-R) at 12 months     | -0.12 (SE=0.05; 95% CI=-0.22, -0.02) | 0.25 (SE=0.20; 95% CI=-0.14, 0.64)  | 0.24 (SE=0.18; 95% CI=-0.11, 0.59)   | -0.03 (SE=0.03; 95% CI=-0.08, 0.02)   | NR | NR |



|                                                                                                                                             |                                                                                                                                                                                                                                              |                                                                                                                                                                     |                                                                                                                                                                                                                                                                                                                             |                                                                                                                                                                                                                                                                                                                                                                                       |                                                                                                                                                                                                                                                                                           |                                                                                                                                                                            |
|---------------------------------------------------------------------------------------------------------------------------------------------|----------------------------------------------------------------------------------------------------------------------------------------------------------------------------------------------------------------------------------------------|---------------------------------------------------------------------------------------------------------------------------------------------------------------------|-----------------------------------------------------------------------------------------------------------------------------------------------------------------------------------------------------------------------------------------------------------------------------------------------------------------------------|---------------------------------------------------------------------------------------------------------------------------------------------------------------------------------------------------------------------------------------------------------------------------------------------------------------------------------------------------------------------------------------|-------------------------------------------------------------------------------------------------------------------------------------------------------------------------------------------------------------------------------------------------------------------------------------------|----------------------------------------------------------------------------------------------------------------------------------------------------------------------------|
| the causal interpretation of the findings?                                                                                                  | No, the mediator was not measured at repeated time points                                                                                                                                                                                    | Yes, the mediators were measured at repeated time points                                                                                                            | Yes, the mediators were measured at repeated time points                                                                                                                                                                                                                                                                    | No, the mediator was not measured at repeated time points                                                                                                                                                                                                                                                                                                                             | No, the mediator was not measured at repeated time points.                                                                                                                                                                                                                                | No, the mediator was not measured at multiple time points.                                                                                                                 |
| 1.5 Was a causal diagram reported, underlying the causal relationship of the treatment, mediator(s) and outcome?                            | Yes                                                                                                                                                                                                                                          | Yes                                                                                                                                                                 | Yes                                                                                                                                                                                                                                                                                                                         | Yes                                                                                                                                                                                                                                                                                                                                                                                   | No                                                                                                                                                                                                                                                                                        | No                                                                                                                                                                         |
| 1.6 Was the sample size for the mediation analysis estimated?                                                                               | No                                                                                                                                                                                                                                           | No                                                                                                                                                                  | No                                                                                                                                                                                                                                                                                                                          | No                                                                                                                                                                                                                                                                                                                                                                                    | No                                                                                                                                                                                                                                                                                        | No                                                                                                                                                                         |
| 1.7 Was the conduct of a mediation analysis dependent on whether a statistically significant intention-to-treat treatment effect was found? | Unsure<br><br>There was a difference in outcome between groups, but it is not clear this was known prior to the analysis (primary data), and there is no mention that the analysis was <i>dependent</i> on a treatment effect being present. | Unsure<br><br>It is stated that a treatment effect in the primary RCT was found. It is not stated that mediation analysis was <i>dependent</i> on treatment effect. | Unsure<br><br>It is stated that a treatment effect in the primary RCT was found. It is not stated that mediation analysis was <i>dependent</i> on treatment effect. Mediation analysis was pre-planned in the trial protocol with no stipulation of the necessity of a treatment effect to proceed with mediation analysis. | Unsure<br><br>It is not explicitly stated that mediation analysis was <i>dependent</i> on treatment effect. However, it is stated that in the primary RCT that a significant treatment effect is present, and an analysis is conducted demonstrating that the putative mediators all had a moderate-large effect size change from baseline to post-treatment compared between groups. | Unsure<br><br>It is not explicitly stated that conduct of mediation was <i>dependent</i> on treatment effect, however outcomes (depression, disability) were chosen for mediation analysis because these were significant in the primary RCT, and others (e.g., pain intensity) were not. | Unsure<br><br>It is stated that a treatment effect was found. It is not stated that the conduct of the mediation was <i>dependent</i> on a treatment effect being present. |
| <b>2. CONDUCT</b>                                                                                                                           |                                                                                                                                                                                                                                              |                                                                                                                                                                     |                                                                                                                                                                                                                                                                                                                             |                                                                                                                                                                                                                                                                                                                                                                                       |                                                                                                                                                                                                                                                                                           |                                                                                                                                                                            |

|                                                                                                                                                                                                                                                                                                                                                          |                                                                                                                                                                                                                     |                                                                                                                                                                                            |                                                                                                                                                              |                                                                                                                                                              |                                                                                                                                                                                                                           |                                                                                                                                                                             |
|----------------------------------------------------------------------------------------------------------------------------------------------------------------------------------------------------------------------------------------------------------------------------------------------------------------------------------------------------------|---------------------------------------------------------------------------------------------------------------------------------------------------------------------------------------------------------------------|--------------------------------------------------------------------------------------------------------------------------------------------------------------------------------------------|--------------------------------------------------------------------------------------------------------------------------------------------------------------|--------------------------------------------------------------------------------------------------------------------------------------------------------------|---------------------------------------------------------------------------------------------------------------------------------------------------------------------------------------------------------------------------|-----------------------------------------------------------------------------------------------------------------------------------------------------------------------------|
| <p>2.1 Was multiple imputation (or other valid approaches) used to handle missing data? If a complete-case analysis was used, did they adjust for baseline covariates that were differentially distributed between responders and non-responders? Was a sensitivity analysis conducted to assess the impact of different approaches on the findings?</p> | <p>Missing data handled using list-wise deletion</p> <p>Yes, a complete-case analysis was conducted. Yes, there was adjustment for baseline covariates using propensity scores.</p> <p>No sensitivity analysis.</p> | <p>Missing data was assumed missing at random and handled using full information maximum likelihood.</p> <p>No, a complete-case analysis was not used.</p> <p>No sensitivity analysis.</p> | <p>Missing data was handled using full information maximum likelihood.</p> <p>No, a complete-case analysis was not used.</p> <p>No sensitivity analysis.</p> | <p>Missing data was handled using full information maximum likelihood.</p> <p>No, a complete-case analysis was not used.</p> <p>No sensitivity analysis.</p> | <p>No missing data.</p> <p>Yes, a complete-case analysis was conducted. No adjustment for baseline covariates as no significant differences between groups for measured variables.</p> <p>n/a – sensitivity analysis.</p> | <p>No imputation was used.</p> <p>Unclear if a complete-case analysis was conducted. No reporting of adjusting for baseline covariates.</p> <p>No sensitivity analysis.</p> |
| <p>2.2 Does the study report separate analyses for separate mediators?</p>                                                                                                                                                                                                                                                                               | <p>n/a – one mediator tested</p>                                                                                                                                                                                    | <p>Yes</p>                                                                                                                                                                                 | <p>Yes</p>                                                                                                                                                   | <p>Yes</p>                                                                                                                                                   | <p>Yes</p>                                                                                                                                                                                                                | <p>Yes</p>                                                                                                                                                                  |
| <p>2.3 Does the study use an appropriate framework for analysis?</p>                                                                                                                                                                                                                                                                                     | <p>Yes, product of coefficient approach justified assuming both models for the outcome and mediator are linear with no interaction.</p>                                                                             | <p>Yes, product of coefficient approach justified assuming both models for the outcome and mediator are linear with no interaction.</p>                                                    | <p>Yes, product of coefficient approach justified assuming both models for the outcome and mediator are linear with no interaction.</p>                      | <p>Yes, structural equation modelling approach justified assuming both models for the outcome and mediator are linear with no interaction.</p>               | <p>Yes, product of coefficient approach justified assuming both models for the outcome and mediator are linear with no interaction.</p>                                                                                   | <p>Yes, product of coefficient approach justified assuming both models for the outcome and mediator are linear with no interaction.</p>                                     |
| <p>2.4 Does the study assess potential interaction(s) between treatment and confounding factors, treatment and mediator, mediator and mediator in the mediator and outcome models? Does the study evaluate the goodness-of-fit of each model?</p>                                                                                                        | <p>No assessment of potential interaction(s)</p> <p>No goodness-of-fit model.</p>                                                                                                                                   | <p>No assessment of potential interaction(s).</p> <p>No goodness-of-fit model.</p>                                                                                                         | <p>Yes, the study assesses potential interactions between the treatment and mediator.</p> <p>No goodness-of-fit model.</p>                                   | <p>No assessment of potential interaction(s)</p> <p>No goodness-of-fit model.</p>                                                                            | <p>No assessment of potential interaction(s)</p> <p>No goodness-of-fit model.</p>                                                                                                                                         | <p>No assessment of potential interaction(s)</p> <p>No goodness-of-fit model.</p>                                                                                           |

|                                                                                                                                                                                                                                 |                                                                                                                                                                                                            |                                                                                                                                                                             |                                                                                 |                                                                                                                                                                             |                                                                                        |                                                                                        |
|---------------------------------------------------------------------------------------------------------------------------------------------------------------------------------------------------------------------------------|------------------------------------------------------------------------------------------------------------------------------------------------------------------------------------------------------------|-----------------------------------------------------------------------------------------------------------------------------------------------------------------------------|---------------------------------------------------------------------------------|-----------------------------------------------------------------------------------------------------------------------------------------------------------------------------|----------------------------------------------------------------------------------------|----------------------------------------------------------------------------------------|
| 2.5 <sup>a</sup> Does the study adjust for mediator-mediator and mediator-outcome confounders?                                                                                                                                  | Mediator-mediator confounders – n/a<br><br>Yes, adjusts for both exposure-mediator and mediator-outcome confounders. The study adjusts for baseline covariates by using propensity scores in all analyses. | No adjustment for mediator-mediator confounders<br><br>Yes, adjusted for mediator-outcome confounders by adjusting for reciprocal mediators in the multiple mediator model. | No adjustment for mediator-mediator or mediator-outcome confounders.            | No adjustment for mediator-mediator confounders<br><br>Yes, adjusted for mediator-outcome confounders by adjusting for reciprocal mediators in the multiple mediator model. | No adjustment for mediator-mediator or mediator-outcome confounders.                   | No adjustment for mediator-mediator or mediator-outcome confounders.                   |
| 2.6 Does the study perform sensitivity analysis to assess sensitivity of the results to (1) the assumption of no measured mediator-mediator or mediator-outcome confounders, (2) potential measurement errors of the mediators? | No sensitivity analyses                                                                                                                                                                                    | No sensitivity analyses                                                                                                                                                     | No sensitivity analyses                                                         | No sensitivity analyses                                                                                                                                                     | No sensitivity analyses                                                                | No sensitivity analyses                                                                |
| 2.7 Does the study use apt strategies when some of the mediator-mediator or mediator-outcome confounders are potentially affected by the treatment (e.g., by considering confounders as mediators themselves)?                  | No                                                                                                                                                                                                         | No                                                                                                                                                                          | No                                                                              | No                                                                                                                                                                          | No                                                                                     | No                                                                                     |
| <b>3. REPORTING</b>                                                                                                                                                                                                             |                                                                                                                                                                                                            |                                                                                                                                                                             |                                                                                 |                                                                                                                                                                             |                                                                                        |                                                                                        |
| 3.1 Does the study report the approaches used for mediation and provide a causal diagram that underlies the analysis?                                                                                                           | Yes, the approach for mediation is described, and a causal diagram is provided.                                                                                                                            | Yes, the approach for mediation is described, and a causal diagram is provided.                                                                                             | Yes, the approach for mediation is described, and a causal diagram is provided. | Yes, the approach for mediation is described, and a causal diagram is provided.                                                                                             | Yes, the approach for mediation is described.<br>No, a causal diagram is not provided. | Yes, the approach for mediation is described.<br>No, a causal diagram is not provided. |

|                                                                                                                                                                          |                                                                                                                                                                            |                                                                                                                                                    |                                                                                                                                                    |                                                                                                                                                     |                                                                                                                                                    |                                                                                                                                                                       |
|--------------------------------------------------------------------------------------------------------------------------------------------------------------------------|----------------------------------------------------------------------------------------------------------------------------------------------------------------------------|----------------------------------------------------------------------------------------------------------------------------------------------------|----------------------------------------------------------------------------------------------------------------------------------------------------|-----------------------------------------------------------------------------------------------------------------------------------------------------|----------------------------------------------------------------------------------------------------------------------------------------------------|-----------------------------------------------------------------------------------------------------------------------------------------------------------------------|
| <p>3.2 Does the study report the sample size calculation, the actual sample size of the mediation analysis and how the missing data is handled?</p>                      | <p>No sample size calculation provided.</p> <p>Yes, actual sample size is described.</p> <p>Yes, description of how missing data were handled.</p>                         | <p>No sample size calculation provided.</p> <p>Yes, actual sample size is described.</p> <p>Yes, description of how missing data were handled.</p> | <p>No sample size calculation provided.</p> <p>Yes, actual sample size is described.</p> <p>Yes, description of how missing data were handled.</p> | <p>No sample size calculation provided.</p> <p>Yes, actual sample size is described.</p> <p>Yes, description of how missing data were handled.</p>  | <p>No sample size calculation provided.</p> <p>Yes, described actual sample size.</p> <p>n/a – no missing data.</p>                                | <p>No sample size calculation provided.</p> <p>Yes, described actual sample size.</p> <p>No description of how missing data were handled.</p>                         |
| <p>3.3 Does the study report all confounders considered and adjusted for in the analysis?</p>                                                                            | <p>Yes, all baseline covariates considered and adjusted for via propensity scores are reported.</p>                                                                        | <p>No confounders were considered or adjusted for.</p>                                                                                             | <p>No confounders were considered or adjusted for.</p>                                                                                             | <p>Yes, baseline values of the mediator and outcome variables that were considered and adjusted for in the analysis as covariates are reported.</p> | <p>No confounders were considered or adjusted for.</p>                                                                                             | <p>No confounders were considered or adjusted for.</p>                                                                                                                |
| <p>3.4 Does the study report the model building procedure and the final form of all models used in the analysis? Do they report the goodness-of-fit of these models?</p> | <p>No, model building procedures and final form of all models in the analysis are not described.</p> <p>No goodness-of-fit metric is provided.</p>                         | <p>No, model building procedures and final form of all models in the analysis are not described.</p> <p>No goodness-of-fit metric is provided.</p> | <p>No, model building procedures and final form of all models in the analysis are not described.</p> <p>No goodness-of-fit metric is provided.</p> | <p>No, model building procedures and final form of all models in the analysis are not described.</p> <p>No goodness-of-fit metric is provided.</p>  | <p>No, model building procedures and final form of all models in the analysis are not described.</p> <p>No goodness-of-fit metric is provided.</p> | <p>No, model building procedures and final form of all models in the analysis are not described.</p> <p>No goodness-of-fit metric is provided.</p>                    |
| <p>3.5 Does the study report the point estimates and the confidence intervals (CIs) of the different direct, indirect and total treatment effects?</p>                   | <p>Reported: point estimates of the direct and total effect.</p> <p>Not reported: point estimates of the indirect effect, and CIs of direct, indirect or total effect.</p> | <p>Reported: point estimates and CIs of the indirect and direct effect.</p> <p>Not reported: point estimates and CIs of the total effect.</p>      | <p>Reported: point estimates and CIs of the indirect effect.</p> <p>Not reported: point estimates and CIs of the direct or total effect.</p>       | <p>Reported: point estimates and CIs of the indirect and direct effect.</p> <p>Not reported: point estimates and CIs of the total effect.</p>       | <p>Reported: point estimates and CIs of the indirect effect.</p> <p>Not reported: point estimate and CIs of the direct and total effects.</p>      | <p>Reported: point estimates for the direct, indirect and total effects and CIs of the indirect effect.</p> <p>Not reported: CIs of the direct and total effects.</p> |

|                                                                                                                                       |                                                                                                                                                                                                                                                                                                                                           |                                                                                                                                                                                                                                                                                                                                                                         |                                                                                                                                                                                                                                                                                                                                                                                                                    |                                                                                                                                                                                                                                                                                                                                                                                |                                                                                                                                                                                                                                                                                                                                                                 |                                                                                                                                                                                                                                                                                                                                                                                    |
|---------------------------------------------------------------------------------------------------------------------------------------|-------------------------------------------------------------------------------------------------------------------------------------------------------------------------------------------------------------------------------------------------------------------------------------------------------------------------------------------|-------------------------------------------------------------------------------------------------------------------------------------------------------------------------------------------------------------------------------------------------------------------------------------------------------------------------------------------------------------------------|--------------------------------------------------------------------------------------------------------------------------------------------------------------------------------------------------------------------------------------------------------------------------------------------------------------------------------------------------------------------------------------------------------------------|--------------------------------------------------------------------------------------------------------------------------------------------------------------------------------------------------------------------------------------------------------------------------------------------------------------------------------------------------------------------------------|-----------------------------------------------------------------------------------------------------------------------------------------------------------------------------------------------------------------------------------------------------------------------------------------------------------------------------------------------------------------|------------------------------------------------------------------------------------------------------------------------------------------------------------------------------------------------------------------------------------------------------------------------------------------------------------------------------------------------------------------------------------|
| 3.6 Does the study report the methods and results of all sensitivity and other additional analyses (in the main paper or appendices)? | N/a - no sensitivity or other analyses are conducted.                                                                                                                                                                                                                                                                                     | Yes, the study reports methods and results of additional analyses (time-lagged analysis). n/a for sensitivity analysis as none conducted.                                                                                                                                                                                                                               | N/a - no sensitivity or other analyses are conducted.                                                                                                                                                                                                                                                                                                                                                              | N/a - no sensitivity or other analyses are conducted.                                                                                                                                                                                                                                                                                                                          | N/a - no sensitivity or other analyses are conducted.                                                                                                                                                                                                                                                                                                           | Yes, the study reports methods and results of additional analyses.<br><br>n/a for sensitivity analysis as none conducted.                                                                                                                                                                                                                                                          |
| 3.7 Does the study discuss the validity of all causal assumptions underlying the analysis (in the main paper or appendices)?          | <p>No - Does not discuss assumption of temporal ordering.</p> <p>Yes - Acknowledges the plausibility of bias due to unmeasured confounders. But, does not justify all measured confounders are adequate to fully adjust for confounding. Also does not follow with a sensitivity analysis to test the plausibility of the assumption.</p> | <p>Yes - Acknowledges the requirement for temporal ordering and conducts a time-lagged analyses to justify the validity of the assumption of temporal ordering</p> <p>No - Does not acknowledge or justify the plausibility of the assumption of no unmeasured confounding. Does not follow with a sensitivity analysis to test the plausibility of the assumption.</p> | <p>Yes - Acknowledges the limitation that temporal order between mediator and outcome was not established. Does not conduct analyses to justify the validity of the assumption of temporal ordering.</p> <p>Yes - Acknowledges the limitation that confounders were not measured or assessed. Does not conduct a sensitivity analysis to test the plausibility of the assumption of no unmeasured confounders.</p> | <p>Yes - Acknowledges the requirement for temporal ordering and conducts a time-lagged mediation model to justify the validity of the assumption of temporal ordering</p> <p>No - Does not acknowledge or justify the plausibility of the assumption of no unmeasured confounding. Does not follow with a sensitivity analysis to test the plausibility of the assumption.</p> | <p>Yes - Acknowledges the requirement for temporal ordering. Does not conduct analyses to justify the validity of the assumption of temporal ordering.</p> <p>No - Does not acknowledge or justify the plausibility of the assumption of no unmeasured confounding. Does not follow with a sensitivity analysis to test the plausibility of the assumption.</p> | <p>Yes - Acknowledges the requirement for temporal ordering and conducts hierarchical regression analyses to justify the validity of the assumption of temporal ordering.</p> <p>No - Does not acknowledge or justify the plausibility of the assumption of no unmeasured confounding. Does not follow with a sensitivity analysis to test the plausibility of the assumption.</p> |

<sup>a</sup>At item 1.3 and 2.5, for observational study designs we also considered adjustment for intervention-mediator and intervention-outcome confounders.

**Supplementary Table S7.** Findings of mediation analyses of included studies (with child-reported outcomes).

| Study                  | Intervention vs Comparator → Mediator (Measure) → Outcome (Measure) <i>Child-Reported</i>                            | Path a Point Estimate (Error)                    | Path b Point Estimate (Error)                 | Direct effect (c') Point Estimate (Error)      | Indirect Effect (ab) Point Estimate (error) | Total Effect (c) Point Estimate (Error)        | Proportion Mediated |
|------------------------|----------------------------------------------------------------------------------------------------------------------|--------------------------------------------------|-----------------------------------------------|------------------------------------------------|---------------------------------------------|------------------------------------------------|---------------------|
| Olbrecht et al. (2018) | Intravenous acetaminophen vs no intravenous acetaminophen → Morphine consumption → Hospital length of stay           | -0.575 (SE=0.133; 95% CI=-0.84, -0.31; p<0.0001) | 0.539 (SE=0.178; 95% CI=0.19, 0.89; p<0.0032) | -0.077 (SE=0.262; 95% CI=-0.59, 0.44; p=0.770) | -0.31 (Sobel's test p=0.013)                | -0.361 (SE=0.253; 95% CI=-0.86, 0.13; p=0.157) | 78.72%              |
| Bonner et al. (2018)   | Exposure-based internet-CBT vs waitlist → Avoidance behavior (IBS-BRQ) → GI symptoms (GSRS-IBS)                      | -1.08 (SE=0.39; 95% CI=-1.84, -0.32; p=0.0060)   | 0.34 (SE=0.02; 95% CI=0.30, 0.38; p<0.001)    | -0.17 (SE=0.19; 95% CI=-0.54, 0.20; p=0.373)   | -0.37 (95% CI= -0.62, -0.09)                | NR                                             | 67.3%               |
|                        | Exposure-based internet-CBT vs waitlist → Perceived stress (PSS-10) → GI symptoms (GSRS-IBS)                         | 0.004 (SE=0.11; 95% CI=-0.21, 0.22; p=0.972)     | 0.41 (SE=0.06; 95% CI=0.29, 0.53; p<0.001)    | -0.55 (SE=0.21; 95% CI=-0.96, -0.14, p=0.009)  | 0.002 (95% CI = -0.08, 0.09)                | NR                                             | 0.3%                |
| Lalouni et al. (2021)  | Exposure-based internet-CBT vs treatment as usual → GI-avoidance (BRQ-C) → Health-related quality of life (PedQL-GI) | -2.14 (SE=0.71; 95% CI=-3.54, -0.75; p=0.003)    | -0.81 (SE=0.24; 95% CI=-1.27, -0.35; p=0.001) | NR                                             | 1.73 (95% CI=0.48, 3.64)                    | NR                                             | NR                  |
|                        | Exposure-based internet-CBT vs treatment as usual → GI-anxiety (VSI-C) → Health-related quality of life (PedQL-GI)   | -1.38 (SE=0.33; 95% CI=-2.03, -0.73; p=0.012)    | -1.62 (SE=0.33; 95% CI=-2.27, -0.97; p<0.001) | NR                                             | 2.23 (95% CI=0.66, 4.37)                    | NR                                             | NR                  |
| Levy et al. (2014)     | SLCBT vs education → Parent threat (PBQ) → GI symptom severity (CSI) at 3 months                                     | -0.17 (SE=0.03; 95% CI=-0.23, -0.11)             | 0.06 (SE=0.07; 95% CI=-0.08, 0.20)            | 0.02 (SE=0.05; 95% CI= -0.08, 0.12)            | -0.01 (SE=0.01; 95% CI=-0.03, 0.01)         | NR                                             | NR                  |
|                        | SLCBT vs education → Parent threat (PBQ) → GI symptom severity (CSI) at 6 months                                     | -0.18 (SE=0.03; 95% CI=-0.24, -0.12)             | 0.13 (SE=0.07; 95% CI=-0.01, 0.27)            | -0.003 (SE=0.05; 95% CI=-0.10, 0.10)           | -0.02 (SE=0.01; 95% CI=-0.05, 0.002)        | NR                                             | NR                  |
|                        | SLCBT vs education → Parent threat (PBQ) → GI symptom severity (CSI) at 12 months                                    | -0.18 (SE=0.03; 95% CI=-0.24, -0.12)             | 0.05 (SE=0.09; 95% CI=-0.13, 0.23)            | -0.11 (SE=0.06; 95% CI=-0.23, 0.01)            | -0.01 (SE=0.02; 95% CI=-0.04, 0.02)         | NR                                             | NR                  |

|                                                                                            |                                      |                                     |                                      |                                       |    |    |
|--------------------------------------------------------------------------------------------|--------------------------------------|-------------------------------------|--------------------------------------|---------------------------------------|----|----|
| SLCBT vs education → Parent threat (PBQ) → Pain intensity (FPS-R) at 3 months              | -0.18 (SE=0.03; 95% CI=-0.24, -0.12) | 0.59 (SE=0.19; 95% CI=0.22, 0.96)   | 0.03 (SE=0.13; 95% CI=-0.22, 0.28)   | -0.11 (SE=0.04; 95% CI=-0.18, -0.03)  | NR | NR |
| SLCBT vs education → Parent threat (PBQ) → Pain intensity (FPS-R) at 6 months              | -0.18 (SE=0.03; 95% CI=-0.24, -0.12) | 0.37 (SE=0.17; 95% CI=0.04, 0.70)   | 0.06 (SE=0.12; 95% CI=-0.18, 0.30)   | -0.07 (SE=0.03; 95% CI=-0.13, -0.003) | NR | NR |
| SLCBT vs education → Parent threat (PBQ) → Pain intensity (FPS-R) at 12 months             | -0.17 (SE=0.03; 95% CI=-0.23, -0.11) | 0.28 (SE=0.19; 95% CI=-0.09, 0.65)  | 0.09 (SE=0.13; 95% CI=-0.16, 0.34)   | -0.05 (SE=0.03; 95% CI=-0.11, 0.02)   | NR | NR |
| SLCBT vs education → Parent solicitousness (ARCS) → GI symptom severity (CSI) at 3 months  | -0.21 (SE=0.03; 95% CI=-0.27, -0.15) | -0.01 (SE=0.08; 95% CI=-0.17, 0.15) | 0.02 (SE=0.05; 95% CI=-0.08, 0.12)   | 0.002 (SE=0.02; 95% CI=-0.03, 0.03)   | NR | NR |
| SLCBT vs education → Parent solicitousness (ARCS) → GI symptom severity (CSI) at 6 months  | -0.21 (SE=0.03; 95% CI=-0.27, -0.15) | -0.08 (SE=0.08; 95% CI=-0.24, 0.08) | -0.003 (SE=0.05; 95% CI=-0.10, 0.10) | 0.02 (SE=0.02; 95% CI=-0.02, 0.05)    | NR | NR |
| SLCBT vs education → Parent solicitousness (ARCS) → GI symptom severity (CSI) at 12 months | -0.21 (SE=0.03; 95% CI=-0.27, -0.15) | -0.08 (SE=0.10; 95% CI=-0.28, 0.12) | -0.11 (SE=0.06; 95% CI=-0.23, 0.01)  | 0.02 (SE=0.02; 95% CI=-0.02, 0.06)    | NR | NR |
| SLCBT vs education → Parent solicitousness (ARCS) → Pain intensity (FPS-R) at 3 months     | -0.21 (SE=0.03; 95% CI=-0.27, -0.15) | -0.16 (SE=0.23; 95% CI=-0.61, 0.29) | 0.03 (SE=0.13; 95% CI=-0.22, 0.28)   | 0.03 (SE=0.05; 95% CI=-0.06, 0.13)    | NR | NR |
| SLCBT vs education → Parent solicitousness (ARCS) → Pain intensity (FPS-R) at 6 months     | -0.21 (SE=0.03; 95% CI=-0.27, -0.15) | -0.37 (SE=0.20; 95% CI=-0.76, 0.02) | 0.06 (SE=0.12; 95% CI=-0.18, 0.30)   | 0.08 (SE=0.04; 95% CI=-0.01, 0.16)    | NR | NR |
| SLCBT vs education → Parent solicitousness (ARCS) → Pain intensity (FPS-R) at 12 months    | -0.21 (SE=0.03; 95% CI=-0.27, -0.15) | -0.10 (SE=0.23; 95% CI=-0.55, 0.35) | 0.09 (SE=0.13; 95% CI=-0.16, 0.34)   | 0.02 (SE=0.05; 95% CI=-0.07, 0.12)    | NR | NR |
| SLCBT vs education → Child catastrophizing (PRI) → GI symptom severity (CSI) at 3 months   | -0.12 (SE=0.05; 95% CI=-0.22, -0.02) | 0.14 (SE=0.05; 95% CI=0.04, 0.24)   | 0.02 (SE=0.05; 95% CI=-0.08, 0.12)   | -0.02 (SE=0.01; 95% CI=-0.03, -0.001) | NR | NR |
| SLCBT vs education → Child catastrophizing (PRI) → GI symptom severity (CSI) at 6 months   | -0.12 (SE=0.05; 95% CI=-0.22, -0.02) | 0.18 (SE=0.05; 95% CI=0.08, 0.28)   | -0.003 (SE=0.05; 95% CI=-0.10, 0.10) | -0.02 (SE=0.01; 95% CI=-0.04, 0.0004) | NR | NR |
| SLCBT vs education → Child catastrophizing (PRI) → GI symptom severity (CSI) at 12 months  | -0.12 (SE=0.05; 95% CI=-0.22, -0.02) | 0.12 (SE=0.07; 95% CI=-0.02, 0.26)  | -0.11 (SE=0.06; 95% CI=-0.23, 0.01)  | -0.01 (SE=0.01; 95% CI=-0.03, 0.06)   | NR | NR |

|                             |                                                                                                      |                                               |                                              |                                                 |                                                                 |                                              |    |
|-----------------------------|------------------------------------------------------------------------------------------------------|-----------------------------------------------|----------------------------------------------|-------------------------------------------------|-----------------------------------------------------------------|----------------------------------------------|----|
|                             | SLCBT vs education → Child catastrophizing (PRI) → Pain intensity (FPS-R) at 3 months                | -0.12 (SE=0.05; 95% CI=-0.22, 0.02)           | 0.24 (SE=0.15; 95% CI=-0.05, 0.53)           | 0.03 (SE=0.13; 95% CI=-0.22, 0.28)              | -0.03 (SE=0.02; 95% CI=-0.07, 0.01)                             | NR                                           | NR |
|                             | SLCBT vs education → Child catastrophizing (PRI) → Pain intensity (FPS-R) at 6 months                | -0.12 (SE=0.05; 95% CI=-0.22, 0.02)           | 0.26 (SE=0.13; 95% CI=0.005, 0.52)           | 0.06 (SE=0.12; 95% CI=-0.18, 0.30)              | -0.03 (SE=0.02, 95% CI=-0.07, 0.009)                            | NR                                           | NR |
|                             | SLCBT vs education → Child catastrophizing (PRI) → Pain intensity (FPS-R) at 12 months               | -0.12 (SE=0.05; 95% CI=-0.22, 0.02)           | 0.16 (SE=0.15; 95% CI=-0.13, 0.45)           | 0.09 (SE=0.13; 95% CI=-0.16, 0.34)              | -0.02 (SE=0.02; 95% CI=-0.06, 0.02)                             | NR                                           | NR |
| Kashikar-Zuck et al. (2013) | CBT vs fibromyalgia education → Pain coping (PCQ) → Functional disability (FDI) at 6 months          | NR                                            | NR                                           | NR                                              | -0.004 (95% CI = -0.06, 0.06)                                   | NR                                           | NR |
|                             | CBT vs fibromyalgia education → Pain coping (PCQ) → Depression (CDI) at 6 months                     | NR                                            | NR                                           | NR                                              | -0.12 (95% CI = -0.82, 0.46)                                    | NR                                           | NR |
|                             | CBT vs fibromyalgia education → Catastrophizing (PCQ) → Functional disability (FDI) at 6 months      | NR                                            | NR                                           | NR                                              | 0.02 (95% CI = -0.04, 0.09)                                     | NR                                           | NR |
|                             | CBT vs fibromyalgia education → Catastrophizing (PCQ) → Depression (CDI) at 6 months                 | NR                                            | NR                                           | NR                                              | -0.32 (95% CI = -1.43, 0.19)                                    | NR                                           | NR |
|                             | CBT vs fibromyalgia education → Coping efficacy (PCQ) → Functional disability (FDI) at 6 months      | NR                                            | NR                                           | NR                                              | -0.04 (95% CI = -0.10, 0.03)                                    | NR                                           | NR |
|                             | CBT vs fibromyalgia education → Coping efficacy (PCQ) → Depression (CDI) at 6 months                 | NR                                            | NR                                           | NR                                              | -0.24 (95% CI = -1.15, 0.38)                                    | NR                                           | NR |
| Wicksele et al. (2011)      | ACT vs MDT + amitriptyline → Pain impairment beliefs (PAIRS) → Pain interference (PII) at 3.5 months | 16.18 (SE=5.92; 95% CI=4.58, 27.78; p=0.0121) | 0.05 (SE=0.04; 95% CI=-0.03, 0.13; p=0.2607) | -0.21 (SE=1.42, 95% CI=-2.99, 2.57; p=0.8847)   | 0.83 (SE=0.74; 90% CI=0.00, 2.40; 95% CI=-0.62, 2.28; p=0.2669) | 0.62 (SE=1.23; 95% CI=-1.79, 3.03; p=0.6218) | NR |
|                             | ACT vs MDT + amitriptyline → Pain impairment beliefs (PAIRS) → Pain interference (PII) at 7 months   | 13.83 (SE=4.86; 95% CI=4.30, 23.36; p=0.0103) | 0.08 (SE=0.07; 95% CI=-0.06, 0.22; p=0.2148) | 0.40 (SE=1.66; 95% CI=-2.85, 3.65; p=0.8115)    | 1.16 (SE=0.95; 90% CI=0.41, 3.18; 95% CI=-0.70, 3.02; p=0.2188) | 1.57 (SE=1.41; 95% CI=-1.19, 4.33; p=0.2807) | NR |
|                             | ACT vs MDT + amitriptyline → Pain impairment beliefs (PAIRS) → Depression (CES-DC) at 3.5 months     | 16.02 (SE=5.69; 95% CI=4.87, 27.17; p=0.0099) | 0.43 (SE=0.019; 95% CI=0.39, 0.47; p=0.0358) | -0.31 (SE=6.09; 95% CI=-12.25, 11.63; p=0.9597) | 6.89 (SE=3.80; 95% CI=1.75, 14.59; p=0.0699)                    | 6.58 (SE=5.69; 95% CI=-4.57,                 | NR |

|                                                                                                |                                                        |                                                     |                                                       |                                                                           |                                                            |                     |  |
|------------------------------------------------------------------------------------------------|--------------------------------------------------------|-----------------------------------------------------|-------------------------------------------------------|---------------------------------------------------------------------------|------------------------------------------------------------|---------------------|--|
|                                                                                                |                                                        |                                                     |                                                       |                                                                           |                                                            | 17.73;<br>p=0.2595) |  |
| ACT vs MDT + amitriptyline → Pain impairment beliefs (PAIRS) → Depression (CES-DC) at 7 months | 17.64 (SE=5.43;<br>95% CI=7.00,<br>28.28; p=0.0047)    | 0.66 (SE=0.33;<br>95% CI=0.01,<br>1.31; p=0.0662)   | -4.36 (SE=9.48;<br>95% CI=-22.94,<br>14.22; p=0.6520) | 11.56 (SE=6.52; 95%<br>CI=2.46, 26.55; p=0.0763)                          | 7.20 (SE=8.05;<br>95% CI=-8.58,<br>22.98;<br>p=0.3835)     | NR                  |  |
| ACT vs MDT + amitriptyline → Pain reactivity (PRS) → Pain interference (PII) at 3.5 months     | 1.80 (SE=0.88;<br>95% CI=0.08,<br>3.52; p=0.0535)      | 0.61 (SE=0.31;<br>95% CI=0.01,<br>1.22; p=0.0617)   | 0.03 (SE=1.32;<br>95% CI=-2.56,<br>2.62; p=0.9846)    | 1.10 (SE=0.74; 95%<br>CI=0.08, 3.01; p=0.1384)                            | 1.12 (SE=1.29;<br>95% CI=-1.41,<br>3.65; p=0.3941)         | NR                  |  |
| ACT vs MDT + amitriptyline → Pain reactivity (PRS) → Pain interference (PII) at 7 months       | 1.74 (SE=0.87;<br>95% CI=0.03,<br>3.45; p=0.0617)      | 0.97 (SE=0.32;<br>95% CI=0.34,<br>1.60; p=0.0075)   | 0.29 (SE=1.31;<br>95% CI=-2.28,<br>2.86; p=0.8281)    | 1.69 (SE=0.98; 95%<br>CI=0.17, 4.32; p=0.844)                             | 1.98 (SE=1.43;<br>95% CI=-0.82,<br>4.78; p=0.1836)         | NR                  |  |
| ACT vs MDT + amitriptyline → Pain reactivity (PRS) → Depression (CES-DC) at 3.5 months         | 1.98 (SE=0.87;<br>95% CI=0.27,<br>3.69; p=0.0329)      | 2.75 (SE=1.33;<br>95% CI=0.14,<br>5.36; p=0.0519)   | 4.52 (SE=5.89;<br>95% CI=-7.02,<br>16.06; p=0.4510)   | 5.43 (SE=3.41; 95%<br>CI=0.01, 14.77; p=0.1119)                           | 9.95 (SE=5.66;<br>95% CI=-1.14,<br>21.04; p=0.935)         | NR                  |  |
| ACT vs MDT + amitriptyline → Pain reactivity (PRS) → Depression (CES-DC) at 7 months           | 1.45 (SE=0.92;<br>95% CI=-0.35,<br>3.25; p=0.1330)     | 4.16 (SE=2.03;<br>95% CI=0.18,<br>8.14; p=0.0582)   | 4.26 (SE=8.02;<br>95% CI=-11.46,<br>19.98; p=0.6028)  | 6.05 (SE=4.63; 90%<br>CI=3.52, 31.96; 95% CI=-<br>3.02, 15.12; p=0.1912)  | 10.31<br>(SE=8.17; 95%<br>CI=-5.70,<br>26.32;<br>p=0.2248) | NR                  |  |
| ACT vs MDT + amitriptyline → Self-efficacy (SES) → Pain interference (PII) at 3.5 months       | -23.31 (SE=12.70;<br>95% CI=-48.20,<br>1.58; p=0.0806) | -0.02 (SE=0.02;<br>95% CI=-0.06,<br>0.02; p=0.4008) | 0.08 (SE=1.40;<br>95% CI=-2.66,<br>2.82; p=0.9572)    | 0.48 (SE=0.55; 90% CI=-<br>0.35, 1.79; 95% CI=-0.60,<br>1.56; p=0.4168)   | 0.52 (SE=1.30;<br>95% CI=-2.03,<br>3.07; p=0.6896)         | NR                  |  |
| ACT vs MDT + amitriptyline → Self-efficacy (SES) → Pain interference (PII) at 7 months         | -25.98 (SE=14.89;<br>95% CI=-55.16,<br>3.20; p=0.0981) | -0.02 (SE=0.02;<br>95% CI=-0.06,<br>0.02; p=0.4566) | 0.99 (SE=1.63;<br>95% CI=-2.20,<br>4.18; p=0.5524)    | 0.47 (SE=0.64; 90% CI=-<br>0.27, 2.32; 95% CI=-0.78,<br>1.72; p=0.4626)   | 1.45 (SE=1.49;<br>95% CI=-1.47,<br>4.37; p=0.3400)         | NR                  |  |
| ACT vs MDT + amitriptyline → Self-efficacy (SES) → Depression (CES-DC) at 3.5 months           | -23.92 (SE=12.23;<br>95% CI=-47.89,<br>0.06; p=0.0634) | -0.04 (SE=0.11;<br>95% CI=-0.26,<br>0.18; p=0.6946) | 5.35 (SE=6.60;<br>95% CI=-7.56,<br>18.29; p=0.4264)   | 1.01 (SE=2.48; 90% CI -<br>3.28, 7.42; 95% CI=-3.85,<br>5.87; p=0.6834)   | 6.36 (SE=5.97;<br>95% CI=-5.34,<br>18.06;<br>p=0.2983)     | NR                  |  |
| ACT vs MDT + amitriptyline → Self-efficacy (SES) → Depression (CES-DC) at 7 months             | -21.03 (SE=15.24;<br>95% CI=-50.90,<br>8.84; p=0.1865) | 0.02 (SE=0.15;<br>95% CI=-0.27,<br>0.31; p=0.9168)  | 7.35 (SE=9.43;<br>95% CI=-11.13,<br>25.83; p=0.4477)  | -0.33 (SE=2.90; 90% CI=-<br>10.22, 3.09; 95% CI=-6.01,<br>5.35; p=0.9102) | 7.03 (SE=8.64;<br>95% CI=-9.90,<br>23.96;<br>p=0.4278)     | NR                  |  |

|                                                                                            |                                               |                                               |                                                |                                                                    |                                                |    |
|--------------------------------------------------------------------------------------------|-----------------------------------------------|-----------------------------------------------|------------------------------------------------|--------------------------------------------------------------------|------------------------------------------------|----|
| ACT vs MDT + amitriptyline → Kinesiophobia (TSK) → Pain interference (PII) at 3.5 months   | 3.84 (SE=3.03; 95% CI=-2.10, 9.78; p=0.2172)  | 0.07 (SE=0.09; 95% CI=-0.11, 0.25; p=0.4513)  | 0.36 (SE=1.29; 95% CI=-2.17, 2.89; p=0.7839)   | 0.26 (SE=0.38; 90% CI=-0.17; 95% CI=-0.48, 1.00; 1.43, p=0.4945)   | 0.62 (SE=1.23; 95% CI=-1.79, 3.03; p=0.6218)   | NR |
| ACT vs MDT + amitriptyline → Kinesiophobia (TSK) → Pain interference (PII) at 7 months     | 3.78 (SE=2.92; 95% CI=-1.94, 9.50; p=0.2119)  | 0.19 (SE=0.10; 95% CI=-0.01, 0.39; p=0.0879)  | 0.85 (SE=1.39; 95% CI=-1.87, 3.57; p=0.55)     | 0.71 (SE=0.66; 90% CI=-0.15, 2.62; 95% CI=-0.58, 2.00; p=0.2768)   | 1.57 (SE=1.41; 95% CI=-1.19, 4.33; p=0.2807)   | NR |
| ACT vs MDT + amitriptyline → Kinesiophobia (TSK) → Depression (CES-DC) at 3.5 months       | 4.00 (SE=2.92; 95% CI=-1.72, 9.72; p=0.1836)  | 0.36 (SE=0.41; 95% CI=-0.44, 1.16; p=0.3895)  | 5.14 (SE=5.95; 95% CI=-6.52, 16.80; p=0.3965)  | 1.44 (SE=1.87; 90% CI=-0.85, 7.76; 95% CI=-2.23, 5.11; p=0.4430)   | 6.58 (SE=5.69; 95% CI=-4.57, 17.73; p=0.2595)  | NR |
| ACT vs MDT + amitriptyline → Kinesiophobia (TSK) → Depression (CES-DC) at 7 months         | 4.33 (SE=3.47; 95% CI=-2.47, 11.13; p=0.2285) | 0.59 (SE=0.56; 95% CI=-0.51, 1.68; p=0.3065)  | 4.64 (SE=8.39; 95% CI=-11.80, 21.08; p=0.5880) | 2.57 (SE=3.04; 90% CI=-1.29, 16.77; 95% CI=-3.39, 8.53; p=0.3984)  | 7.20 (SE=8.05; 95% CI=-8.58, 22.98; p=0.3835)  | NR |
| ACT vs MDT + amitriptyline → Catastrophizing (PCQ) → Pain interference (PII) at 3.5 months | -1.39 (SE=1.89; 95% CI=-5.09, 2.31; p=0.4710) | 0.08 (SE=0.15; 95% CI=-0.21, 0.37; p=0.5956)  | 1.10 (SE=1.28; 95% CI=-1.41, 3.61; p=0.4000)   | -0.11 (SE=0.24; 90% CI=-1.04, 0.09; 95% CI=-0.58, 0.36; p=0.6513)  | 0.99 (SE=1.25; 95% CI=-1.46, 3.44; p=0.4337)   | NR |
| ACT vs MDT + amitriptyline → Catastrophizing (PCQ) → Pain interference (PII) at 7 months   | -2.28 (SE=1.94; 95% CI=-6.08, 1.52; p=0.2554) | -0.03 (SE=0.18; 95% CI=-0.38, 0.32; p=0.8843) | 1.92 (SE=1.53; 95% CI=-1.08, 4.92; p=0.2259)   | 0.06 (SE=0.39; 90% CI=-0.47, 0.74; 95% CI=-0.70, 0.82; p=0.88)     | 1.98 (SE=1.43; 95% CI=-0.82, 4.78; p=0.1836)   | NR |
| ACT vs MDT + amitriptyline → Catastrophizing (PCQ) → Depression (CES-DC) at 3.5 months     | -0.84 (SE=1.94; 95% CI=-4.64, 2.96; p=0.6678) | 0.51 (SE=0.63; 95% CI=-0.72, 1.74; p=0.4295)  | 9.09 (SE=5.73; 95% CI=-2.14, 20.32; p=0.1274)  | -0.43 (SE=1.08; 90% CI=-4.73, 0.90; 95% CI=-2.55, 1.69; p=0.6940)  | 8.66 (SE=5.66; 95% CI=-2.43, 19.75; p=0.1399)  | NR |
| ACT vs MDT + amitriptyline → Catastrophizing (PCQ) → Depression (CES-DC) at 7 months       | -2.22 (SE=1.98; 95% CI=-6.10, 1.66; p=0.2795) | 0.25 (SE=1.06; 95% CI=-1.83, 2.33; p=0.8179)  | 10.86 (SE=8.74; 95% CI=-6.27, 27.99; p=0.2331) | -0.55 (SE=2.26; 90% CI=-11.14, 0.44; 95% CI=-4.98, 3.88; p=0.8074) | 10.31 (SE=8.17; 95% CI=-5.70, 26.32; p=0.2248) | NR |
| ACT vs MDT + amitriptyline → Pain intensity (VAS) → Pain interference (PII) at 3.5 months  | 1.41 (SE=1.05; 95% CI=-0.65, 3.47; p=0.1920)  | 0.42 (SE=0.24; 95% CI=-0.05, 0.89; p=0.0921)  | 0.02 (SE=1.23; 95% CI=-2.39, 2.43; p=0.9869)   | 0.60 (SE=0.54; 90% CI=-0.02, 2.18; 95% CI=-0.46, 1.66; p=0.2697)   | 0.62 (SE=1.23; 95% CI=-1.79, 3.03; p=0.6218)   | NR |
| ACT vs MDT + amitriptyline → Pain intensity (VAS) → Pain interference (PII) at 7 months    | 1.64 (SE=1.11; 95% CI=-0.54, 3.82; p=0.1564)  | 0.32 (SE=0.29; 95% CI=-0.25, 0.89; p=0.2845)  | 1.04 (SE=1.48; 95% CI=-1.86, 3.94; p=0.4905)   | 0.52 (SE=0.57; 90% CI=-0.04, 2.35; 95% CI=-0.60, 1.64; p=0.3564)   | 1.57 (SE=1.41; 95% CI=-1.19, 4.33; p=0.2807)   | NR |

|                                                                                       |                                              |                                               |                                               |                                                                    |                                               |    |
|---------------------------------------------------------------------------------------|----------------------------------------------|-----------------------------------------------|-----------------------------------------------|--------------------------------------------------------------------|-----------------------------------------------|----|
| ACT vs MDT + amitriptyline → Pain intensity (VAS) → Depression (CES-DC) at 3.5 months | 1.30 (SE=1.02; 95% CI=-0.70, 3.30; p=0.2162) | 0.60 (SE=1.18; 95% CI=-1.71, 2.91; p=0.6149)  | 5.80 (SE=5.98; 95% CI=-5.92, 17.52, p=0.3432) | 0.78 (SE=1.59; 90% CI=-1.33, 6.08; 95% CI=-2.34, 3.90; p=0.6220)   | 6.58 (SE=5.69; 95% CI=-4.57, 17.73; p=0.2595) | NR |
| ACT vs MDT + amitriptyline → Pain intensity (VAS) → Depression (CES-DC) at 7 months   | 1.63 (SE=1.20; 95% CI=-0.72, 3.98; p=0.1926) | -0.13 (SE=1.67; 95% CI=-3.40, 3.14; p=0.9379) | 7.42 (SE=8.74, 95% CI=-9.71, 24.55; p=0.4082) | -0.22 (SE=2.58; 90% CI=-12.16, 0.33; 95% CI=-5.28, 4.84; p=0.9332) | 7.20 (SE=8.05; 95% CI=-8.58, 22.98; p=0.3835) | NR |

If 95% confidence intervals not stated in original study, or only 90% confidence interval provided, then they were calculated using the standard error (indicated in red). Abbreviations: ACT, Acceptance and Commitment Therapy; ARCS, Adult Responses to Children's Symptoms; CBT, Cognitive Behavioral Therapy; CDI, Children's Depression Inventory; CES-DC, Centre for Epidemiological Studies Depression Scale for Children; CI, Confidence Interval; CSI, Children's Somatization Inventory; FDI, Functional Disability Inventory; FPS-R, Faces Pain Scale – Revised; GSRS-IBS, Gastrointestinal Symptom Rating Scale – Irritable Bowel Syndrome; IBS-BRQ, IBS-specific Behavioural Response Questionnaire; MDT, Multidisciplinary Treatment; NR, Not Reported; PBQ, PAIRS, Pain and Impairment Relationship Scale; PBQ, Pain Beliefs Questionnaire; PCQ, Pain Coping Questionnaire; PII, Pain Interference Index; PRI, Pain Response Inventory; PRS, Pain Reactivity Scale; PSS-10, Perceived Stress Scale – 10; SES, Self-Efficacy Scale; SE, Standard error; SLCBT, Social Learning and Cognitive Behavioral Treatment; TSK, Tampa Scale of Kinesiophobia; VAS, Visual Analogue Scale

---

## eReferences

- Absoud, M, Brex, P, Ciccarelli, O, Diribe, O, Giovannoni, G, Hellier, J, Howe, R, Holland, R, Kelly, J, McCrone, P, et al. (2017) A multicentre randomised controlled TRial of IntraVenous immunoglobulin compared with standard therapy for the treatment of transverse myelitis in adults and children (STRIVE). *Health Technology Assessment (Winchester, England)*, 21(31), 1-50. doi:10.3310/hta21310
- Allantaz, F, Stichweh, D & Pascual, V (2007) Interleukin-1 as a therapeutic target in systemic-onset juvenile idiopathic arthritis. *Future Rheumatology*, 2(3), 305-312. doi:10.2217/17460816.2.3.305
- Allen, KD & Shriver, MD (1998) Role of parent-mediated pain behavior management strategies in biofeedback treatment of childhood migraines. *Behavior Therapy*, 29(3), 477-490. doi:10.1016/S0005-7894(98)80044-0
- Allison, DJ, Thomas, A, Beaudry, K & Ditor, DS (2016) Targeting inflammation as a treatment modality for neuropathic pain in spinal cord injury: A randomized clinical trial. *Journal of Neuroinflammation*, 13(152). doi:10.1186/s12974-016-0625-4
- Altieri, F & Cassetta, M (2020) The impact of tooth-borne vs computer-guided bone-borne rapid maxillary expansion on pain and oral health-related quality of life: A parallel cohort study. *American Journal of Orthodontics and Dentofacial Orthopedics*, 158(5), e83-e90.
- Anand, P, Shenoy, R, Palmer, JE, Baines, AJ, Lai, RY, Robertson, J, Bird, N, Ostefeld, T & Chizh, BA (2011) Clinical trial of the p38 MAP kinase inhibitor dilmapiomod in neuropathic pain following nerve injury. *European Journal of Pain*, 15(10), 1040-1048. doi:10.1016/j.ejpain.2011.04.005
- Angst, MS, Phillips, NG, Drover, DR, Tingle, M, Ray, A, Swan, GE, Lazzeroni, LC & Clark, JD (2012) Pain sensitivity and opioid analgesia: a pharmacogenomic twin study. *Pain*, 153(7), 1397-1409. doi:10.1016/j.pain.2012.02.022
- Atlas, LY, Wielgosz, J, Whittington, RA & Wager, TD (2014) Specifying the non-specific factors underlying opioid analgesia: expectancy, attention, and affect. *Psychopharmacology*, 231(5), 813-823. doi:10.1007/s00213-013-3296-1
- Baccini, M, Mattei, A & Mealli, F (2017) Bayesian inference for causal mechanisms with application to a randomized study for postoperative pain control. *Biostatistics*, 18(4), 605-617. doi:10.1093/biostatistics/kxx010
- Baildam, E, Ruperto, N, Brunner, H, Zuber, Z, Keane, C, Harari, O, Kenwright, A, Cuttica, RJ, Keltsev, V, Xavier, R, et al. (2013) Efficacy and safety of tocilizumab in polyarticular juvenile idiopathic arthritis: Cherish results at week 40. *Rheumatology (United Kingdom)*, 52, i35. doi:10.1093/rheumatology/ket200
- Barber, J & Mayer, D (1977) Evaluation of the efficacy and neural mechanism of a hypnotic analgesia procedure in experimental and clinical dental pain. *Pain*, 4(1), 41-48. doi:10.1016/0304-3959(77)90085-9

- Barlow, KM, Dewey, D, Urban, KJ, Seeger, T, Kirton, A, MacMaster, F, Brooks, B, Mikrogianakis, A, Crawford, S, Netel-Aguirre, A, et al. (2014) Playgame: A randomized, double blind, placebo controlled trial of melatonin for the treatment of post concussion syndrome in youth. *Journal of Neurotrauma*, 31 (12), A59-A60. doi:10.1089/neu.2014.9935.abstracts
- Beal, SJ, Kashikar-Zuck, S, King, C, Black, W, Barnes, J & Noll, JG (2020) Heightened risk of pain in young adult women with a history of childhood maltreatment: A prospective longitudinal study. *Pain*, 161(1), 156-165. doi:<http://dx.doi.org/10.1097/j.pain.0000000000001706>
- Bentley, MW, Stas, JM, Johnson, JM, Viet, BC & Garrett, N (2005) Effects of preincisional ketamine treatment on natural killer cell activity and postoperative pain management after oral maxillofacial surgery. *AANA journal*, 73(6), 427-436.
- Blackwell, LS, Romero, SL, Marciel, KK, Romero, CV & Quittner, AL (2012) Pain in adolescents and young adults with CF: Location, severity, and predictors. *Pediatric Pulmonology*, 47, 430. doi:10.1002/ppul.22682
- Bonnert, M, Bjureberg, J, Lalouni, M, Hedman, E, Serlachius, E & Ljotsson, B (2017) Reducing avoidant behaviour improves gastrointestinal symptoms in adolescents with irritable bowel syndrome: A mediation analysis of exposure-based cognitive behaviour therapy. *Journal of Pediatric Gastroenterology and Nutrition*, 64 (Supplement 1), 132-133. doi:10.1097/01.mpg.0000516381.25680.b4
- Bonnert, M, Olén, O, Bjureberg, J, Lalouni, M, Hedman-Lagerlöf, E, Serlachius, E & Ljótsson, B (2018) The role of avoidance behavior in the treatment of adolescents with irritable bowel syndrome: a mediation analysis. *Behav Res Ther*, 105, 27-35.
- Bowers, H & Wroe, A (2016) Beliefs about emotions mediate the relationship between emotional suppression and quality of life in irritable bowel syndrome. *Journal of Mental Health*, 25(2), 154-158. doi:10.3109/09638237.2015.1101414
- Brennan, PA, Gardiner, GT & McHugh, J (1991) A double blind clinical trial to assess the value of aprotinin in third molar surgery. *British Journal of Oral & Maxillofacial Surgery*, 29(3), 176-179. doi:10.1016/0266-4356(91)90033-2
- Brown, EA, De Young, A, Kimble, R & Kenardy, J (2019) Impact of Parental Acute Psychological Distress on Young Child Pain-Related Behavior Through Differences in Parenting Behavior During Pediatric Burn Wound Care. *Journal of Clinical Psychology in Medical Settings*, 04, 04. doi:10.1007/s10880-018-9596-1
- Brown, RT, Shaftman, SR, Tilley, BC, Anthony, KK, Kral, MC, Maxson, B, Mee, L, Bonner, MJ, Vogler, LB, Schanberg, LE, et al. (2012) The health education for lupus study: a randomized controlled cognitive-behavioral intervention targeting psychosocial adjustment and quality of life in adolescent females with systemic lupus erythematosus. *American Journal of the Medical Sciences*, 344(4), 274-282. doi:10.1097/MAJ.0b013e3182449be9

- Brunner, HI, Ruperto, N, Quartier, P, Constantin, T, Wulffraat, N, Horneff, G, Brik, R, McCann, L, Ozdogan, H, Rutkowska-Sak, L, et al. (2012) Efficacy and safety of canakinumab in patients with active systemic juvenile idiopathic arthritis and fever: Results from two pivotal phase 3 trials. *Arthritis and Rheumatism*, 64, S326-S327. doi:10.1002/art.37735
- Bryskin, RB, Londergan, B, Wheatley, R, Heng, R, Lewis, M, Barraza, M, Mercer, E & Ye, G (2015) Transversus Abdominis Plane Block Versus Caudal Epidural for Lower Abdominal Surgery in Children: A Double-Blinded Randomized Controlled Trial. *Anesthesia & Analgesia*, 121(2), 471-478. doi:10.1213/ANE.0000000000000779
- Buenaver, LF, Quartana, PJ, Grace, EG, Sarlani, E, Simango, M, Edwards, RR, Haythornthwaite, JA & Smith, MT (2012) Evidence for indirect effects of pain catastrophizing on clinical pain among myofascial temporomandibular disorder participants: the mediating role of sleep disturbance. *Pain*, 153(6), 1159-1166. doi:10.1016/j.pain.2012.01.023
- Caixeta, JAS, Sampaio, JCS, da Costa, PSS & Avelino, MAG (2020) Analgesia for adenotonsillectomy in children: a comparison between peritonsillar infiltration of tramadol, ketamine, and placebo. *European Archives of Oto-Rhino-Laryngology*, 277(6), 1815-1822. doi:<https://dx.doi.org/10.1007/s00405-020-05878-z>
- Cakar Turhan, KS, Salviz, EA, Beton, S, Timuroglu, ST, Catav, S & Ozatamer, O (2015) Peritonsillar infiltration with levobupivacaine for posttonsillectomy pain relief: does concentration have any effect? A double-blind randomized controlled clinical study. *European Review for Medical & Pharmacological Sciences*, 19(7), 1276-1284.
- Cappucci, S & Simons, LE (2015) Anxiety sensitivity and fear of pain in paediatric headache patients. *Eur J Pain*, 19(2), 246-252. doi:10.1002/ejp.542
- Castien, R, Blankenstein, A, van der Windt, D, Heymans, MW & Dekker, J (2013) The working mechanism of manual therapy in participants with chronic tension-type headache. *Journal of Orthopaedic & Sports Physical Therapy*, 43(10), 693-699. doi:10.2519/jospt.2013.4868
- Chan, SF, Connelly, M & Wallace, DP (2017) The Relationship Between Pain Characteristics, Peer Difficulties, and Emotional Functioning Among Adolescents Seeking Treatment for Chronic Pain: A Test of Mediational Models. *Journal of Pediatric Psychology*, 42(9), 941-951. doi:10.1093/jpepsy/jsx074
- Chou, PL & Lin, CC (2011) A pain education programme to improve patient satisfaction with cancer pain management: a randomised control trial. *Journal of Clinical Nursing*, 20(13-14), 1858-1869. doi:10.1111/j.1365-2702.2011.03740.x
- Christidis, N, Omrani, S, Fredriksson, L, Gjerset, M, Louca, S, Hedenberg-Magnusson, B & Ernberg, M (2015) Repeated tender point injections of granisetron alleviate chronic myofascial pain--a randomized, controlled,

- double-blinded trial. *Journal of Headache & Pain*, 16, 104. doi:10.1186/s10194-015-0588-3
- Clementi, MA, Chang, Y-H, Gambhir, R, Lebel, A & Logan, DE (2020) The Impact of Sleep on Disability and School Functioning: Results From a Tertiary Pediatric Headache Center. *Journal of Child Neurology*, 35(3), 221-227.
- Conti, Y, Vatine, JJ, Levy, S, Levin Meltz, Y, Hamdan, S & Elkana, O (2020) Pain Catastrophizing Mediates the Association Between Mindfulness and Psychological Distress in Chronic Pain Syndrome. *Pain Practice*.
- Corinaldesi, R, Stanghellini, V, Cremon, C, Gargano, L, Cogliandro, RF, De Giorgio, R, Bartesaghi, G, Canovi, B & Barbara, G (2009) Effect of mesalazine on mucosal immune biomarkers in irritable bowel syndrome: a randomized controlled proof-of-concept study. *Alimentary Pharmacology & Therapeutics*, 30(3), 245-252. doi:10.1111/j.1365-2036.2009.04041.x
- Cunningham, NR, Kalomiris, A, Peugh, J, Farrell, M, Pentiuk, S, Mallon, D, Le, C, Moorman, E, Fussner, L & Dutta, RA (2020) Cognitive Behavior Therapy Tailored to Anxiety Symptoms Improves Pediatric Functional Abdominal Pain Outcomes: A Randomized Clinical Trial. *The Journal of Pediatrics*.
- Dekker, C, Goossens, ME, Bastiaenen, CH & Verbunt, JA (2016) Study protocol for a multicentre randomized controlled trial on effectiveness of an outpatient multimodal rehabilitation program for adolescents with chronic musculoskeletal pain (2B Active). *BMC Musculoskeletal Disorders*, 17, 317. doi:10.1186/s12891-016-1178-5
- DiVasta, AD, Feldman, HA, Gallagher, JS, Laufer, MR, Hornstein, MD & Gordon, CM (2015) The effect of hormonal add-back therapy in adolescents treated with a gonadotropin releasing hormone (GnRH) agonist for endometriosis: A randomized trial. *Journal of Adolescent Health*, 56(2), S24. doi:10.1016/j.jadohealth.2014.10.049
- Du, SX, Jia, YR, Ren, SQ, Gong, XJ, Tang, H, Wan-Shui, W & Li-Ming, S (2018) The protective effects of *Bacillus licheniformis* preparation on gastrointestinal disorders and inflammation induced by radiotherapy in pediatric patients with central nervous system tumor. *Advances in Medical Sciences*, 63(1), 134-139. doi:10.1016/j.advms.2017.09.005
- Dura-Ferrandis, E, Ferrando-Garcia, M, Galdon-Garrido, MJ & Andreu-Vaillo, Y (2017) Confirming the mechanisms behind cognitive-behavioural therapy effectiveness in chronic pain using structural equation modeling in a sample of patients with temporomandibular disorders. *Clinical Psychology & Psychotherapy*, 24(6), 1377-1383. doi:10.1002/cpp.2114
- Essner, BS (2013) *The direct and indirect impact of pain intensity, weight status, and activity involvement on social competence outcomes in children and adolescents with spina bifida*. ProQuest Dissertations Publishing. Retrieved from <http://search.proquest.com/docview/1083085872/> (347)
- Evans, JR, Hainsworth, KR, Cao, Y, Khan, KA, Ladwig, R, Mano, KEJ, Davies, WH & Weisman, SJ (2014, May-June) *Examining the relationship between chronic pain*

and functioning across time - Do improvements in functional disability precede reductions in pain? Paper presented at the National Conference on Pediatric Psychology, Philadelphia, PA.

- Evans, S, Cousins, L, Tsao, JC, Sternlieb, B & Zeltzer, LK (2011) Protocol for a randomized controlled study of Iyengar yoga for youth with irritable bowel syndrome. *Trials*, 12, 15. doi:10.1186/1745-6215-12-15
- Evans, S, Djilas, V, Seidman, LC, Zeltzer, LK & Tsao, JCI (2017) Sleep Quality, Affect, Pain, and Disability in Children With Chronic Pain: Is Affect a Mediator or Moderator? *Journal of Pain*, 18(9), 1087-1095. doi:10.1016/j.jpain.2017.04.007
- Evans, S, Payne, LA, Seidman, L, Lung, K, Zeltzer, L & Tsao, JC (2016) Maternal Anxiety and Children's Laboratory Pain: The Mediating Role of Solicitousness. *Children*, 3(2), 20. doi:10.3390/children3020010
- Evans, S, Shipton, EA & Keenan, T (2006) The relationship between maternal chronic pain and child adjustment: the role of parenting as a mediator. *Journal of Pain*, 7(4), 236-243. doi:10.1016/j.jpain.2005.10.010
- Fales, JL, Murphy, LK, Rights, JD & Palermo, TM (2020) Daily peer victimization experiences of adolescents with and without chronic pain: associations with mood, sleep, pain, and activity limitations. *The Journal of Pain*, 21(1-2), 97-107.
- Ferrari, MD, Farkkila, M, Reuter, U, Pilgrim, A, Davis, C, Krauss, M, Diener, HC & European, COLI (2010) Acute treatment of migraine with the selective 5-HT<sub>1F</sub> receptor agonist lasmiditan--a randomised proof-of-concept trial. *Cephalalgia*, 30(10), 1170-1178. doi:10.1177/0333102410375512
- Field, JJ, Kassim, A, Brandow, A, Embury, SH, Matsui, N, Wilkerson, K, Bryant, V, Zhang, L, Simpson, P & DeBaun, MR (2020) Phase 2 trial of montelukast for prevention of pain in sickle cell disease. *Blood Advances*, 4(6), 1159-1165. doi:<https://dx.doi.org/10.1182/bloodadvances.2019001165>
- Finch, PM, Knudsen, L & Drummond, PD (2009) Reduction of allodynia in patients with complex regional pain syndrome: A double-blind placebo-controlled trial of topical ketamine. *Pain*, 146(1-2), 18-25. doi:10.1016/j.pain.2009.05.017
- Fiorelli, A, Vicidomini, G, Laperuta, P, Busiello, L, Perrone, A, Napolitano, F, Messina, G & Santini, M (2010) Pre-emptive local analgesia in video-assisted thoracic surgery sympathectomy. *European Journal of Cardio-Thoracic Surgery*, 37(3), 588-593. doi:10.1016/j.ejcts.2009.07.040
- Fisher, E, Caes, L, Clinch, J, Tobias, JH & Eccleston, C (2016) Anxiety at 13 and its effect on pain, pain-related anxiety, and pain-related disability at 17: An ALSPAC cohort longitudinal analysis. *Psychology Health & Medicine*, 21(1), 1-9. doi:10.1080/13548506.2015.1051062
- Forsythe, LP, Thorn, B, Day, M & Shelby, G (2011) Race and sex differences in primary appraisals, catastrophizing, and experimental pain outcomes. *Journal of Pain*, 12(5), 563-572. doi:10.1016/j.jpain.2010.11.003
- Foxen-Craft, EC (2017) *Exercise-induced hypoalgesia: Brief submaximal exercise, acute cold pressor pain, and psychological mediators in young adults*. ProQuest Dissertations Publishing. Retrieved from <http://search.proquest.com/docview/1825633748/>

- Garland, EL, Gaylord, SA, Palsson, O, Faurot, K, Douglas Mann, J & Whitehead, WE (2012) Therapeutic mechanisms of a mindfulness-based treatment for IBS: effects on visceral sensitivity, catastrophizing, and affective processing of pain sensations. *Journal of Behavioral Medicine*, 35(6), 591-602. doi:10.1007/s10865-011-9391-z
- Gaultney, WM (2020) An exploration of dispositional mindfulness and the mechanisms of pain processing in children. *Dissertation Abstracts International: Section B: The Sciences and Engineering*, 81(2-B).
- Ghorbani, Z, Rafiee, P, Fotouhi, A, Haghighi, S, Magham, RR, Ahmadi, ZS, Djalali, M, Zareei, M, Jahromi, SR & Shahemi, S (2020) The effects of vitamin D supplementation on interictal serum levels of calcitonin gene-related peptide (CGRP) in episodic migraine patients: post hoc analysis of a randomized double-blind placebo-controlled trial. *The Journal of Headache and Pain*, 21(1), 1-13.
- Gillis, ME (2002) *The effects of written emotional disclosure on adjustment in fibromyalgia syndrome*. ProQuest Dissertations Publishing. Retrieved from <http://search.proquest.com/docview/287863044/>
- Glenn, JJ, Michel, BD, Franklin, JC, Hooley, JM & Nock, MK (2014) Pain analgesia among adolescent self-injurers. *Psychiatry Research*, 220(3), 921-926. doi:10.1016/j.psychres.2014.08.016
- Gomez-Mancilla, B, Cutler, NR, Leibowitz, MT, Spierings, EL, Klapper, JA, Diamond, S, Goldstein, J, Smith, T, Couch, JR, Fleishaker, J, et al. (2001) Safety and efficacy of PNU-142633, a selective 5-HT<sub>1D</sub> agonist, in patients with acute migraine. *Cephalalgia*, 21(7), 727-732. doi:10.1111/j.1468-2982.2001.00208.x
- Gottschlich, MM, Mayes, T, Khoury, J, McCall, J, Simakajornboon, N & Kagan, RJ (2011) The effect of ketamine administration on nocturnal sleep architecture. *Journal of Burn Care & Research*, 32(5), 535-540. doi:10.1097/BCR.0b013e31822ac7d1
- Grinsvall, C, Tornblom, H, Tack, J, Van Oudenhove, L & Simren, M (2015) The effect of GI-specific anxiety and abuse on visceral sensitivity in irritable bowel syndrome is mediated through somatization. *United European Gastroenterology Journal*, 3(5), A637-A638. doi:10.1177/2050640615601623
- Harel, Z, Riggs, S, Vaz, R, Flanagan, P & Harel, D (2004) The use of the leukotriene receptor antagonist montelukast (Singulair) in the management of dysmenorrhea in adolescents. *Journal of Pediatric & Adolescent Gynecology*, 17(3), 183-186. doi:10.1016/j.jpog.2004.03.037
- Harper, FW, Penner, LA, Peterson, A, Albrecht, TL & Taub, J (2012) Children's positive dispositional attributes, parents' empathic responses, and children's responses to painful pediatric oncology treatment procedures. *Journal of Psychosocial Oncology*, 30(5), 593-613. doi:10.1080/07347332.2012.703771
- Hashish, I, Hai, HK, Harvey, W, Feinmann, C & Harris, M (1988) Reduction of postoperative pain and swelling by ultrasound treatment: a placebo effect. *Pain*, 33(3), 303-311. doi:10.1016/0304-3959(88)90289-8

- He, HG, Zhu, L, Chan, WC, Xiao, C, Klainin-Yobas, P, Wang, W, Cheng, KF & Luo, N (2015) A randomized controlled trial of the effectiveness of an educational intervention on outcomes of parents and their children undergoing inpatient elective surgery: study protocol. *Journal of Advanced Nursing*, 71(3), 665-675. doi:10.1111/jan.12521
- Hechler, T, Dobe, M, Damschen, U, Blankenburg, M, Schroeder, S, Kosfelder, J & Zernikow, B (2010) The pain provocation technique for adolescents with chronic pain: preliminary evidence for its effectiveness. *Pain Medicine*, 11(6), 897-910. doi:10.1111/j.1526-4637.2010.00839.x
- Heeney, M, Hoppe, C, Abboud, M, Inusa, B, Kanter, J, Ogutu, B, Brown, P, Heath, L, Jakubowski, J, Zhou, C, et al. (2016a, June) *Determining effects of platelet inhibition on vaso-occlusive events (DOVE) trial: A double-blind, placebo-controlled, study of prasugrel in paediatric patients with sickle cell anaemia*. Paper presented at the 21st Congress of the European Hematology Association, Denmark.
- Heeney, MM, Abboud, MR, Amilon, C, Andersson, M, Githanga, J, Inusa, B, Kanter, J, Leonsson-Zachrisson, M, Michelson, AD & Berggren, AR (2018) Ticagrelor versus placebo for the reduction of vasoocclusive crises in pediatric sickle cell disease: Design of a randomized, double-blind, parallel-group, multicenter phase 3 study (HESTIA3). *HemaSphere*, 2 (Supplement 2), 669-670. doi:10.1097/HS9.0000000000000060
- Heeney, MM, Hoppe, CC, Abboud, MR, Inusa, B, Kanter, J, Ogutu, B, Brown, PB, Heath, LE, Jakubowski, JA, Zhou, C, et al. (2016b) A Multinational Trial of Prasugrel for Sickle Cell Vaso-Occlusive Events. *New England Journal of Medicine*, 374(7), 625-635. doi:10.1056/NEJMoa1512021
- Herroeder, S, Pecher, S, Schonherr, ME, Kaulitz, G, Hahnenkamp, K, Friess, H, Bottiger, BW, Bauer, H, Dijkgraaf, MG, Durieux, ME, et al. (2007) Systemic lidocaine shortens length of hospital stay after colorectal surgery: a double-blinded, randomized, placebo-controlled trial. *Annals of Surgery*, 246(2), 192-200. doi:10.1097/SLA.0b013e31805dac11
- Hildenbrand, AK, Kassam-Adams, N, Barakat, LP, Kohser, KL, Ciesla, JA, Delahanty, DL, Fein, JA, Ragsdale, LB & Marsac, ML (2020) Posttraumatic stress in children after injury: The role of acute pain and opioid medication use. *Pediatric emergency care*.
- Hillgrove-Stuart, J, Pillai Riddell, R, Horton, R & Greenberg, S (2013) Toy-mediated distraction: clarifying the role of agent of distraction and preneedle distress in toddlers. *Pain Research & Management*, 18(4), 197-202. doi:10.1155/2013/392125
- Hilt, LM (2009) *A biopsychosocial approach to rumination in young adolescent girls*. ProQuest Dissertations Publishing. Retrieved from <http://search.proquest.com/docview/305040452/>
- Hind, D, Parkin, J, Whitworth, V, Rex, S, Young, T, Hampson, L, Sheehan, J, Maguire, C, Cantrill, H, Scott, E, et al. (2017) Aquatic therapy for children with Duchenne muscular dystrophy: a pilot feasibility randomised controlled

- trial and mixed-methods process evaluation. *Health Technology Assessment (Winchester, England)*, 21(27), 1-120. doi:10.3310/hta21270
- Hooke, MC, Rodgers, C, Taylor, O, Koerner, KM, Mitby, P, Moore, I, Scheurer, ME, Hockenberry, MJ & Pan, W (2018) Physical Activity, the Childhood Cancer Symptom Cluster-Leukemia, and Cognitive Function: A Longitudinal Mediation Analysis. *Cancer Nursing*, 41(6), 434-440. doi:10.1097/NCC.0000000000000634
- Hoyeraal, HM, Froland, SS & Salvesen, CF (1978) No effect of transfer factor in juvenile rheumatoid arthritis by double blind trial. *Annals of the Rheumatic Diseases*, 37(2), 175-179. doi:10.1136/ard.37.2.175
- Ingelmo, PM, Bendall, EJ, Frawley, G, Locatelli, BG, Milan, B, Lodetti, D & Fumagalli, R (2007) Bupivacaine caudal epidural anesthesia: assessing the effect of general anesthetic technique on block onset. *Paediatric Anaesthesia*, 17(3), 255-262. doi:10.1111/j.1460-9592.2006.02090.x
- Janssens, KAM, Oldehinkel, AJ, Bonvanie, IJ & Rosmalen, JGM (2014) An inactive lifestyle and low physical fitness are associated with functional somatic symptoms in adolescents. The TRAILS study. *Journal of Psychosomatic Research*, 76(6), 454-457. doi:10.1016/j.jpsychores.2014.03.008
- Jones, J, Gordish-Dressman, H, Pestieau, S & Reddy, SK (2018, April) *Dexmedetomidine as a non-opiate adjunct to multimodal perioperative pain control in pediatric patients undergoing craniofacial reconstructive surgery: A retrospective study*. Paper presented at the George Washington Research Days, George Washington University.
- Jonsbu, E, Dammen, T, Morken, G, Moum, T & Martinsen, EW (2011) Short-term cognitive behavioral therapy for non-cardiac chest pain and benign palpitations: a randomized controlled trial. *Journal of Psychosomatic Research*, 70(2), 117-123. doi:10.1016/j.jpsychores.2010.09.013
- Junghans-Rutelonis, AN, Craner, JR, Ale, CM, Harbeck-Weber, C, Fischer, PR & Weiss, KE (2018) Youth with Chronic Pain and Postural Orthostatic Tachycardia Syndrome (POTS): Treatment Mediators of Improvement in Functional Disability. *Journal of Clinical Psychology in Medical Settings*, 25(4), 471-484. doi:10.1007/s10880-018-9558-7
- Kashikar-Zuck, S, Sil, S, Lynch-Jordan, AM, Ting, TV, Peugh, J, Schikler, KN, Hashkes, PJ, Arnold, LM, Passo, M & Richards-Mauze, MM (2013) Changes in pain coping, catastrophizing, and coping efficacy after cognitive-behavioral therapy in children and adolescents with juvenile fibromyalgia. *J Pain*, 14(5), 492-501.
- Khayat, S, Fanaei, H, Kheirkhah, M, Moghadam, ZB, Kasaeian, A & Javadimehr, M (2015) Curcumin attenuates severity of premenstrual syndrome symptoms: A randomized, double-blind, placebo-controlled trial. *Complementary Therapies in Medicine*, 23(3), 318-324. doi:10.1016/j.ctim.2015.04.001
- Kilkens, TO, Honig, A, Fekkes, D & Brummer, RJ (2005) The effects of an acute serotonergic challenge on brain-gut responses in irritable bowel syndrome

- patients and controls. *Alimentary Pharmacology & Therapeutics*, 22(9), 865-874. doi:10.1111/j.1365-2036.2005.02660.x
- Kobayashi, I, Tozawa, Y, Ueki, M, Takezaki, S, Watanabe, S, Iwafuchi, H, Yamada, M, Kuwana, M & Ariga, T (2017) Tacrolimus in combination with methotrexate and corticosteroid for the treatment of child-onset anti-signal recognition particle antibody-positive necrotizing myopathy. *Scandinavian Journal of Rheumatology*, 46(5), 409-410. doi:10.1080/03009742.2016.1241297
- Kościelniak-Merak, B, Batko, I, Kobylarz, K, Sztefko, K & Tomasik, PJ (2020) Intravenous, perioperatively administered lidocaine regulates serum pain modulators' concentrations in children undergoing spinal surgery. *Pain Medicine*, 21(7), 1464-1473.
- Lai, HH, Chiu, CH, Kong, MS, Chang, CJ & Chen, CC (2019) Probiotic *Lactobacillus casei*: effective for Managing Childhood Diarrhea by Altering Gut Microbiota and Attenuating Fecal Inflammatory Markers. *Nutrients*, 11(5). doi:10.3390/nu11051150
- Lalouni, M, Hesser, H, Bonnert, M, Hedman-Lagerlöf, E, Serlachius, E, Olén, O & Ljótsson, B (2020) Breaking the vicious circle of fear and avoidance in children with abdominal pain: A mediation analysis. *J Psychosom Res*, 140, 110287.
- Langer, S, Romano, J, Mancl, L & Levy, RL (2013) Parental catastrophizing mediates the association between child pain behavior and parental solicitousness. *Psychosomatic Medicine*, 75 (3), A-46. doi:10.1097/01.psy.0000429452.16135.1b
- Langer, SL, Romano, JM, Mancl, L & Levy, RL (2014) Parental Catastrophizing Partially Mediates the Association between Parent-Reported Child Pain Behavior and Parental Protective Responses. *Pain Research and Treatment*, 2014, 751097. doi:10.1155/2014/751097
- Lee, A, Moulton, D, Acra, S, Walker, L, McKernan, L & Russell, A (2020) Clinical Hypnosis in Pediatric Crohn's Disease: A Randomized Controlled Trial. *Gastroenterology*, 158 (3 Supplement), S100-S101. doi:<http://dx.doi.org/10.1053/j.gastro.2019.11.239>
- Leeuw, M, Goossens, ME, van Breukelen, GJ, de Jong, JR, Heuts, PH, Smeets, RJ, Koke, AJ & Vlaeyen, JW (2008) Exposure in vivo versus operant graded activity in chronic low back pain patients: results of a randomized controlled trial. *Pain*, 138(1), 192-207. doi:10.1016/j.pain.2007.12.009
- Levy, R, Langer, S, Labus, J, DuPen, M, Ballard, S & Romano, J (2012) Changes in pain cognitions mediate effects of cognitive-behavioral treatment on reductions in symptoms and disability in children with unexplained abdominal pain. *American Journal of Gastroenterology*, 107, S782. doi:10.1038/ajg.2012.278
- Levy, RL, Langer, SL, Romano, JM, Labus, J, Walker, LS, Murphy, TB, Van Tilburg, M, Feld, LD, Christie, DL & Whitehead, WE (2014) Cognitive mediators of treatment outcomes in pediatric functional abdominal pain. *Clin J Pain*, 30(12), 1033.

- Lewis, HA & Klierer, W (1996) Hope, coping, and adjustment among children with sickle cell disease: Tests of mediator and moderator models. *Journal of Pediatric Psychology*, 21(1), 25-41. doi:10.1093/jpepsy/21.1.25
- Li, Q, Li, L, Bi, L, Xiao, C, Lin, Z, Cao, S, Liao, Z & Gu, J (2016) Kunxian capsules in the treatment of patients with ankylosing spondylitis: a randomized placebo-controlled clinical trial. *Trials*, 17(1), 337. doi:10.1186/s13063-016-1438-6
- Lim, CS, Karlson, C, Edmond, SN, Welkom, JS, Osunkwo, I & Cohen, LL (2019) Emotion-Focused Avoidance Coping Mediates the Association Between Pain and Health-Related Quality of Life in Children With Sickle Cell Disease. *Journal of Pediatric Hematology/Oncology*, 41(3), 194-201. doi:10.1097/MPH.0000000000001429
- Lioffi, C, White, P, Franck, L & Hatira, P (2007) Parental pain expectancy as a mediator between child expected and experienced procedure-related pain intensity during painful medical procedures. *Clinical Journal of Pain*, 23(5), 392-399. doi:10.1097/AJP.0b013e31804ac00c
- Lohsiriwat, V, Lert-akyamanee, N & Rushatamukayanunt, W (2004) Efficacy of pre-incisional bupivacaine infiltration on postoperative pain relief after appendectomy: prospective double-blind randomized trial. *World Journal of Surgery*, 28(10), 947-950. doi:10.1007/s00268-004-7471-8
- Love, SC, Mara, CA, Kalomiris, AE & Cunningham, NR (2019) The Influence of Caregiver Distress and Child Anxiety in Predicting Child Somatization in Youth with Functional Abdominal Pain Disorders. *Children*, 6(12), 03. doi:<https://dx.doi.org/10.3390/children6120134>
- Lowen, MB, Mayer, EA, Sjoberg, M, Tillisch, K, Naliboff, B, Labus, J, Lundberg, P, Strom, M, Engstrom, M & Walter, SA (2013) Effect of hypnotherapy and educational intervention on brain response to visceral stimulus in the irritable bowel syndrome. *Alimentary Pharmacology & Therapeutics*, 37(12), 1184-1197. doi:10.1111/apt.12319
- Lu, P, Hsu, J, Keane, C, Fettner, S, Wang, J, Ruperto, N, Harari, O, Brunner, HI & De Benedetti, F (2013) PReS-FINAL-2159: Tocilizumab (TCZ) dosing in juvenile idiopathic arthritis (JIA): Optimising for different JIA type and body weight patients. *Pediatric Rheumatology. Conference: 20th Pediatric Rheumatology European Society, PReS Congress. Ljubljana Slovenia. Conference Publication.*; 11(SUPPL. 2). doi:10.1186/1546-0096-11-S2-P171
- Luciano, JV, Guallar, JA, Aguado, J, Lopez-Del-Hoyo, Y, Oliván, B, Magallon, R, Alda, M, Serrano-Blanco, A, Gili, M & Garcia-Campayo, J (2014) Effectiveness of group acceptance and commitment therapy for fibromyalgia: a 6-month randomized controlled trial (EFFIGACT study). *Pain*, 155(4), 693-702. doi:10.1016/j.pain.2013.12.029
- Lustig, JL, Ireys, HT, Sills, EM & Walsh, BB (1996) Mental health of mothers of children with juvenile rheumatoid arthritis: appraisal as a mediator. *Journal of Pediatric Psychology*, 21(5), 719-733. doi:10.1093/jpepsy/21.5.719

- Maddison, R, Prapavessis, H & Clatworthy, M (2006) Modeling and rehabilitation following anterior cruciate ligament reconstruction. *Annals of Behavioral Medicine*, 31(1), 89-98. doi:10.1207/s15324796abm3101\_13
- Malattia, C, Ruperto, N, Pederzoli, S, Palmisani, E, Pistorio, A, Wouters, C, Dolezalova, P, Flato, B, Garay, S & Giancane, G (2020) Tocilizumab may slow radiographic progression in patients with systemic or polyarticular-course juvenile idiopathic arthritis: post hoc radiographic analysis from two randomized controlled trials. *Arthritis research & therapy*, 22(1), 1-11.
- Mansell, G, Kamper, SJ & Kent, P (2013) Why and how back pain interventions work: what can we do to find out? *Best Pract Res Clin Rheumatol*, 27(5), 685-697.
- McGarrigle, L, Ferreira, N, DeAmicis, L & Connolly, S (2018) Pediatric chronic pain and adjustment: The mediating role of acceptance, catastrophizing and kinesiophobia. *Pain Practice*, 18 (Supplement 1), 103. doi:10.1111/papr.12693
- Meier, PM, Zurakowski, D, Berde, CB & Sethna, NF (2009) Lumbar sympathetic blockade in children with complex regional pain syndromes: a double blind placebo-controlled crossover trial. *Anesthesiology*, 111(2), 372-380. doi:10.1097/ALN.0b013e3181a9ea90
- Melzack, R, Guite, S & Gonshor, A (1980a) Relief of dental pain by ice massage of the hand. *Canadian Medical Association Journal*, 122(2), 189-191.
- Melzack, R, Jeans, ME, Stratford, JG & Monks, RC (1980b) Ice massage and transcutaneous electrical stimulation: comparison of treatment for low-back pain. *Pain*, 9(2), 209-217. doi:10.1016/0304-3959(80)90008-1
- Merskey, H & Bogduk, N (1994) *Classification of chronic pain: descriptions of chronic pain syndromes and definitions of pain terms* (2nd ed.). Seattle: IASP Press.
- Miller, M, Williams, A, Scott, E, Trost, Z & Hirsh, A (2017) Pain-related injustice perception, but not catastrophizing, partially mediates the relationship between pain intensity and pain outcomes in children with chronic pain. *Journal of Pain*, 18, S41. doi:10.1016/j.jpain.2017.02.154
- Milling, LS, Reardon, JM & Carosella, GM (2006) Mediation and moderation of psychological pain treatments: response expectancies and hypnotic suggestibility. *Journal of Consulting & Clinical Psychology*, 74(2), 253-262. doi:10.1037/0022-006X.74.2.253
- Milling, LS, Shores, JS, Coursen, EL, Menario, DJ & Farris, CD (2007) Response expectancies, treatment credibility, and hypnotic suggestibility: mediator and moderator effects in hypnotic and cognitive-behavioral pain interventions. *Annals of Behavioral Medicine*, 33(2), 167-178. doi:10.1007/bf02879898
- Mohammed, FA, Mahdi, N, Sater, MA, Al-Ola, K & Almawi, WY (2010) The relation of C-reactive protein to vasoocclusive crisis in children with sickle cell disease. *Blood Cells Molecules & Diseases*, 45(4), 293-296. doi:10.1016/j.bcmd.2010.08.003

- Moore, UJ, Seymour, RA & Rawlins, MD (1992) The efficacy of locally applied aspirin and acetaminophen in postoperative pain after third molar surgery. *Clinical Pharmacology & Therapeutics*, 52(3), 292-296. doi:10.1038/clpt.1992.144
- Mulroy, SJ, Winstein, CJ, Kulig, K, Beneck, GJ, Fowler, EG, DeMuth, SK, Sullivan, KJ, Brown, DA, Lane, CJ & Physical Therapy Clinical Research, N (2011) Secondary mediation and regression analyses of the PTClinResNet database: determining causal relationships among the International Classification of Functioning, Disability and Health levels for four physical therapy intervention trials. *Physical Therapy*, 91(12), 1766-1779. doi:10.2522/ptj.20110024
- Neville, A, Kopala-Sibley, DC, Soltani, S, Asmundson, GJ, Jordan, A, Carleton, RN, Yeates, KO, Schulte, F & Noel, M (2020) A longitudinal examination of the interpersonal fear avoidance model of pain: the role of intolerance of uncertainty. *Pain*, 162(1), 152-160.
- Nickel, JC, Atkinson, G, Krieger, JN, Mills, IW, Pontari, M, Shoskes, DA & Crook, TJ (2012) Preliminary assessment of safety and efficacy in proof-of-concept, randomized clinical trial of tanezumab for chronic prostatitis/chronic pelvic pain syndrome. *Urology*, 80(5), 1105-1110. doi:10.1016/j.urology.2012.07.035
- Niedermann, K, de Bie, RA, Kubli, R, Ciurea, A, Steurer-Stey, C, Villiger, PM & Buchi, S (2011) Effectiveness of individual resource-oriented joint protection education in people with rheumatoid arthritis. A randomized controlled trial. *Patient Education & Counseling*, 82(1), 42-48. doi:10.1016/j.pec.2010.02.014
- Noel, M, Rabbitts, JA, Tai, GG & Palermo, TM (2015) Remembering pain after surgery: a longitudinal examination of the role of pain catastrophizing in children's and parents' recall. *Pain*, 156(5), 800-808. doi:10.1097/j.pain.000000000000102
- Noel, M, Vinall, J, Tomfohr-Madsen, L, Holley, AL, Wilson, AC & Palermo, TM (2018) Sleep Mediates the Association Between PTSD Symptoms and Chronic Pain in Youth. *Journal of Pain*, 19(1), 67-75. doi:10.1016/j.jpain.2017.09.002
- Olbrecht, VA, Ding, L, Spruance, K, Hossain, M, Sadhasivam, S & Chidambaran, V (2018) Intravenous acetaminophen reduces length of stay via mediation of postoperative opioid consumption after posterior spinal fusion in a pediatric cohort. *Clin J Pain*, 34(7), 593-599.
- Palermo, TM, Zempsky, WT, Dampier, CD, Lalloo, C, Hundert, AS, Murphy, LK, Bakshi, N & Stinson, JN (2018) iCanCope with Sickle Cell Pain: Design of a randomized controlled trial of a smartphone and web-based pain self-management program for youth with sickle cell disease. *Contemporary Clinical Trials*, 74, 88-96. doi:10.1016/j.cct.2018.10.006
- Palstam, A, Larsson, A, Lofgren, M, Ernberg, M, Bjersing, J, Bileviciute-Ljungar, I, Gerdle, B, Kosek, E & Mannerkorpi, K (2016) Decrease of fear avoidance beliefs following person-centered progressive resistance exercise contributes to reduced pain disability in women with fibromyalgia: secondary exploratory analyses from a randomized controlled trial. *Arthritis Research & Therapy*, 18(1), 116. doi:10.1186/s13075-016-1007-0

- Pavlova, M, Ference, J, Hancock, M & Noel, M (2017) Disentangling the Sleep-Pain Relationship in Pediatric Chronic Pain: The Mediating Role of Internalizing Mental Health Symptoms. *Pain Research & Management*, 2017, 1586921. doi:10.1155/2017/1586921
- Pavlova, M, Kopala-Sibley, DC, Nania, C, Mychasiuk, R, Christensen, J, McPeak, A, Tomfohr-Madsen, L, Katz, J, Palermo, TM & Noel, M (2020) Sleep disturbance underlies the co-occurrence of trauma and pediatric chronic pain: a longitudinal examination. *Pain*, 161(4), 821-830. doi:<https://dx.doi.org/10.1097/j.pain.0000000000001769>
- Pavlova, M & Noel, M (2018) JPP student journal club commentary: Novel parent intervention reduces vaccine injection pain in toddlers: Potential mechanisms and path forward. *Journal of Pediatric Psychology*, 43(3), 234-236. doi:10.1093/jpepsy/jsx152
- Peatfield, RC, Petty, RG & Rose, FC (1983) Double blind comparison of mefenamic acid and acetaminophen (paracetamol) in migraine. *Cephalalgia*, 3(2), 129-134. doi:10.1046/j.1468-2982.1983.0302129.x
- Petter, M, McGrath, PJ, Chambers, CT & Dick, BD (2014) The effects of mindful attention and state mindfulness on acute experimental pain among adolescents. *Journal of Pediatric Psychology*, 39(5), 521-531. doi:10.1093/jpepsy/jsu007
- Peugh, JL, Strotman, D, McGrady, M, Rausch, J & Kashikar-Zuck, S (2017) Beyond intent to treat (ITT): A complier average causal effect (CACE) estimation primer. *Journal of School Psychology*, 60, 7-24. doi:10.1016/j.jsp.2015.12.006
- Poppert Cordts, KM, Stone, AL, Beveridge, JK, Wilson, AC & Noel, M (2019) The (Parental) Whole Is Greater Than the Sum of Its Parts: A Multifactorial Model of Parent Factors in Pediatric Chronic Pain. *Journal of Pain*, 20(7), 786-795. doi:10.1016/j.jpain.2019.01.004
- Posner, KL (1999) *A pharmacobehavioral intervention to reduce child cancer distress*. ProQuest Dissertations Publishing. Retrieved from <http://search.proquest.com/docview/304460697/>
- Pringsheim, T, Magnoux, E, Dobson, CF, Hamel, E & Aube, M (2002) Melatonin as adjunctive therapy in the prophylaxis of cluster headache: a pilot study. *Headache*, 42(8), 787-792. doi:10.1046/j.1526-4610.2002.02181.x
- Puzino, K, Guite, JW, Moore, M, Lewen, MO & Williamson, AA (2018) The relationship between parental responses to pain, pain catastrophizing, and adolescent sleep in adolescents with chronic pain. *Children's Health Care*, 47(3), 239-260. doi:10.1080/02739615.2017.1327358
- Quispe-Cabanillas, JG, Damasceno, A, von Glehn, F, Brandao, CO, Damasceno, BP, Silveira, WD & Santos, LM (2012) Impact of electroacupuncture on quality of life for patients with Relapsing-Remitting Multiple Sclerosis under treatment with immunomodulators: a randomized study. *BMC Complementary & Alternative Medicine*, 12, 209. doi:10.1186/1472-6882-12-209

- Randall, ET, Cole-Lewis, YC, Petty, CR & Jervis, KN (2020) Understanding How Perfectionism Impacts Intensive Interdisciplinary Pain Treatment Outcomes: A Nonrandomized Trial. *Journal of Pediatric Psychology*.
- Reddy, SK, Jones, JJ, Gordish-Dressman, H & Pestieau, SR (2020) Dexmedetomidine as an opioid-sparing agent in pediatric craniofacial surgery. *Children*, 7(7), 68.
- Reed-Knight, B, van Tilburg, MAL, Levy, RL, Langer, SL, Romano, JM, Murphy, TB, DuPen, MM & Feld, AD (2018) Maladaptive Coping and Depressive Symptoms Partially Explain the Association Between Family Stress and Pain-Related Distress in Youth With IBD. *Journal of Pediatric Psychology*, 43(1), 94-103. doi:10.1093/jpepsy/jsx082
- Reid, JK (2003) *Family characteristics and caregiver psychosocial factors related to health outcomes in children with sickle cell disease: A mediational model*. ProQuest Dissertations Publishing. Retrieved from <http://search.proquest.com/docview/305498714/>
- Reme, SE, Stahl, D, Kennedy, T, Jones, R, Darnley, S & Chalder, T (2011) Mediators of change in cognitive behaviour therapy and mebeverine for irritable bowel syndrome. *Psychological Medicine*, 41(12), 2669-2679. doi:10.1017/S0033291711000328
- Riggenbach, A, Amouroux, R, Van Petegem, S, Tourniaire, B, Tonelli, A, Wiener, S, Hofer, M & Antonietti, JP (2020) Autonomy and competence satisfaction as resources for facing chronic pain disability in adolescence: a self-determination perspective. *Psychology, Health & Medicine*, 1-11.
- Robinson, JP, Theodore, BR, Dansie, EJ, Wilson, HD & Turk, DC (2013) The role of fear of movement in subacute whiplash-associated disorders grades I and II. *Pain*, 154(3), 393-401. doi:10.1016/j.pain.2012.11.011
- Rolli Salathe, C, Kalin, W, Zilse, S & Elfering, A (2020) Baseline musculoskeletal pain and impaired sleep related to school pressure influence the development of musculoskeletal pain in N = 107 adolescents in a 5-year longitudinal study. *European Spine Journal*, 29(3), 540-548. doi:<https://dx.doi.org/10.1007/s00586-019-06211-x>
- Ruperte, N, Zhang, A, Morcos, PN, Huppertz, H, Minden, K, Myones, B, Onel, K, Siammopoulou, A, Silva, C, Kenwright, A, et al. (2011) Tocilizumab in patients with systemic juvenile idiopathic arthritis (sJIA): 12-week pharmacokinetic (PK) and pharmacodynamic (PD) data from the phase 3 TENDER trial. *Clinical and Experimental Rheumatology*, 29(2), 421.
- Ruperto, N, Brunner, H, Quartier, P, Constantin, T, Wulffraat, N, Horneff, G, Brik, R, McCann, L, Kasapcopur, O, Rutkowska-Sak, L, et al. (2013) Efficacy and safety of canakinumab, fully human anti-interleukin-1beta antibody, in systemic juvenile idiopathic arthritis. *Annals of the Rheumatic Disease*, 71. doi:10.1136/annrheumdis-2012-eular.1180
- Saxe, G, Geary, M, Bedard, K, Bosquet, M, Miller, A, Koenen, K, Stoddard, F & Moulton, S (2006) Separation anxiety as a mediator between acute morphine

- administration and PTSD symptoms in injured children. *Annals of the New York Academy of Sciences*, 1071, 41-45. doi:10.1196/annals.1364.004
- Schoenen, J, Jensen, RH, Lanteri-Minet, M, Lainez, MJ, Gaul, C, Goodman, AM, Caparso, A & May, A (2013) Stimulation of the sphenopalatine ganglion (SPG) for cluster headache treatment. Pathway CH-1: a randomized, sham-controlled study. *Cephalalgia*, 33(10), 816-830. doi:10.1177/0333102412473667
- Schreiber, S, Vinokur, S, Shavelzon, V, Pick, CG, Zahavi, E & Shir, Y (2001) A randomized trial of fluoxetine versus amitriptyline in musculo-skeletal pain. *Israel Journal of Psychiatry & Related Sciences*, 38(2), 88-94.
- Schurman, JV, Friesen, CA, Dai, H, Danda, CE, Hyman, PE & Cocjin, JT (2012) Sleep problems and functional disability in children with functional gastrointestinal disorders: an examination of the potential mediating effects of physical and emotional symptoms. *BMC Gastroenterology*, 12, 142. doi:10.1186/1471-230X-12-142
- Shah, UK, Galinkin, J, Chiavacci, R & Briggs, M (2002) Tonsillectomy by means of plasma-mediated ablation: prospective, randomized, blinded comparison with monopolar electrosurgery. *Archives of Otolaryngology -- Head & Neck Surgery*, 128(6), 672-676. doi:10.1001/archotol.128.6.672
- Shi, GX, Liu, CZ, Zhu, J, Guan, LP, Wang, DJ & Wu, MM (2011) Effects of acupuncture at Sanyinjiao (SP6) on prostaglandin levels in primary dysmenorrhea patients. *Clinical Journal of Pain*, 27(3), 258-261. doi:10.1097/AJP.0b013e3181fb27ae
- Shi, Y, Wang, P, Hu, X & Ye, Z (2015) Evaluation of the Etoricoxib-Mediated Pain-Relieving Effect in Patients Undergoing Lumbar Fusion Procedures for Degenerative Lumbar Scoliosis: A Prospective Randomized, Double-Blind Controlled Study. *Cell Biochemistry & Biophysics*, 71(3), 1313-1318. doi:10.1007/s12013-014-0350-5
- Sieberg, CB, Williams, S & Simons, LE (2011) Do parent protective responses mediate the relation between parent distress and child functional disability among children with chronic pain? *Journal of Pediatric Psychology*, 36(9), 1043-1051. doi:10.1093/jpepsy/jsr043
- Simister, HD, Tkachuk, GA, Shay, BL, Vincent, N, Pear, JJ & Skrabek, RQ (2018) Randomized Controlled Trial of Online Acceptance and Commitment Therapy for Fibromyalgia. *Journal of pain*, 19(7), 741-753. doi:10.1016/j.jpain.2018.02.004
- Slaman, J, van den Berg-Emons, HJ, van Meeteren, J, Twisk, J, van Markus, F, Stam, HJ, van der Slot, WM & Roebroek, ME (2015) A lifestyle intervention improves fatigue, mental health and social support among adolescents and young adults with cerebral palsy: focus on mediating effects. *Clinical Rehabilitation*, 29(7), 717-727. doi:10.1177/0269215514555136
- Spinhoven, P, Ter Kuile, M, Kole-Snijders, AM, Hutten Mansfeld, M, Den Ouden, DJ & Vlaeyen, JW (2004) Catastrophizing and internal pain control as mediators

- of outcome in the multidisciplinary treatment of chronic low back pain. *European Journal of Pain*, 8(3), 211-219. doi:10.1016/j.ejpain.2003.08.003
- Stratelak, PA, White, W & Wenzel, D (1996) The effect of glycopyrrolate premedication on postoperative sore throat. *AANA Journal*, 64(6), 545-548.
- Taheri, S, Campbell, C, Mazza, E & Devries, M (2016) Randomized controlled trial of IGG-based food elimination for treatment of primary headache in children-interim analysis. *Cephalalgia*, 36 (Supplement 1), 89. doi:10.1177/0333102416670318
- Tarnowski, KJ, McGrath, ML, Calhoun, MB & Drabman, RS (1987) Pediatric burn injury: self- versus therapist-mediated debridement. *Journal of Pediatric Psychology*, 12(4), 567-579. doi:10.1093/jpepsy/12.4.567
- ter Kuile, MM, Spinhoven, P, Linssen, AC & van Houwelingen, HC (1996) Cognitive coping and appraisal processes in the treatment of chronic headaches. *Pain*, 64(2), 257-264. doi:10.1016/0304-3959(95)00135-2
- Thieme, K, Turk, DC, Gracely, RH, Maixner, W & Flor, H (2015) The relationship among psychological and psychophysiological characteristics of fibromyalgia patients. *Journal of Pain*, 16(2), 186-196. doi:10.1016/j.jpain.2014.11.009
- Tran, S (2015) *Longitudinal associations between anxiety, pain catastrophizing, and treatment outcomes in complex pediatric chronic pain*. ProQuest Dissertations Publishing. Retrieved from <http://search.proquest.com/docview/1615378112/>
- Tran, ST, Jastrowski Mano, KE, Hainsworth, KR, Medrano, GR, Anderson Khan, K, Weisman, SJ & Davies, WH (2015) Distinct Influences of Anxiety and Pain Catastrophizing on Functional Outcomes in Children and Adolescents With Chronic Pain. *Journal of Pediatric Psychology*, 40(8), 744-755. doi:10.1093/jpepsy/jsv029
- Tremblay, I & Sullivan, MJ (2010) Attachment and pain outcomes in adolescents: the mediating role of pain catastrophizing and anxiety. *Journal of Pain*, 11(2), 160-171. doi:10.1016/j.jpain.2009.06.015
- Troullos, ES, Hargreaves, KM, Butler, DP & Dionne, RA (1990) Comparison of nonsteroidal anti-inflammatory drugs, ibuprofen and flurbiprofen, with methylprednisolone and placebo for acute pain, swelling, and trismus. *Journal of Oral and Maxillofacial Surgery*, 48(9), 945-952. doi:10.1016/0278-2391(90)90007-O
- Tsao, JC, Lu, Q, Kim, SC & Zeltzer, LK (2006a) Relationships among anxious symptomatology, anxiety sensitivity and laboratory pain responsivity in children. *Cognitive Behaviour Therapy*, 35(4), 207-215. doi:10.1080/16506070600898272
- Tsao, JC, Lu, Q, Myers, CD, Kim, SC, Turk, N & Zeltzer, LK (2006b) Parent and child anxiety sensitivity: relationship to children's experimental pain responsivity. *Journal of Pain*, 7(5), 319-326. doi:10.1016/j.jpain.2005.12.004
- Turner, JA, Whitney, C, Dworkin, SF, Massoth, D & Wilson, L (1995) Do changes in patient beliefs and coping strategies predict temporomandibular disorder

- treatment outcomes? *Clinical Journal of Pain*, 11(3), 177-188.  
doi:10.1097/00002508-199509000-00004
- Tutuncu, AC, Erbabacan, E, Dilmen Korkmaz, O, Ekici, B, Koksall, MG, Altintas, F & Kaya, G (2013) Effects of preemptive epidural infusion on cytokine response and postoperative pain in pediatric patients. [Pediatrik hastalarda preemtif epidural Infuzyonun postoperatif agri{dotless} ve sitokin cevaba etkisi.]. *Haseki Tip Bulteni*, 51(4), 162-167. doi:10.4274/Haseki.1015
- van Tilburg, MAL, Claar, RL, Romano, JM, Langer, SL, Drossman, DA, Whitehead, WE, Abdullah, B & Levy, RL (2017) Psychological Factors May Play an Important Role in Pediatric Crohn's Disease Symptoms and Disability. *Journal of Pediatrics*, 184, 94-100.e101. doi:10.1016/j.jpeds.2017.01.058
- VanDyck, R, Zitman, FG, Linssen, AC & Spinhoven, P (1991) Autogenic training and future oriented hypnotic imagery in the treatment of tension headache: outcome and process. *International Journal of Clinical & Experimental Hypnosis*, 39(1), 6-23. doi:10.1080/00207149108409615
- Varni, JW, Nutakki, K & Swigonski, NL (2020) Cognitive functioning and pain interference mediate pain predictive effects on health-related quality of life in pediatric patients with Neurofibromatosis Type 1. *European Journal of Paediatric Neurology*, 28, 64-69.
- Varni, JW, Shulman, RJ, Self, MM, Saeed, SA, Zacur, GM, Patel, AS, Nurko, S, Neigut, DA, Franciosi, JP, Saps, M, et al. (2018) Perceived medication adherence barriers mediating effects between gastrointestinal symptoms and health-related quality of life in pediatric inflammatory bowel disease. *Quality of Life Research*, 27(1), 195-204. doi:10.1007/s11136-017-1702-6
- Venkatraghavan, L, Li, L, Bailey, T, Manninen, PH & Tymianski, M (2016) Sumatriptan improves postoperative quality of recovery and reduces postcraniotomy headache after cranial nerve decompression. *British Journal of Anaesthesia*, 117(1), 73-79. doi:10.1093/bja/aew152
- VerLee, S, Butz, C, Ackerman, C, Burger, J, Fabia, R & Besner, G (2012, March) *The utility of virtual reality in minimizing procedural distress with pediatric burn patients*. Paper presented at the 44th Annual Meeting of the American Burn Association, Seattle, WA, United States.
- Vo, T-T, Superchi, C, Boutron, I & Vansteelandt, S (2020) The conduct and reporting of mediation analysis in recently published randomized controlled trials: results from a methodological systematic review. *J Clin Epidemiol*, 117, 78-88. doi:10.1016/j.jclinepi.2019.10.001
- Vos, T, Abajobir, AA, Abate, KH, Abbafati, C, Abbas, KM, Abd-Allah, F, Abdulkader, RS, Abdulle, AM, Abebo, TA, Abera, SF, et al. (2017) Global, regional, and national incidence, prevalence, and years lived with disability for 328 diseases and injuries for 195 countries, 1990–2016: a systematic analysis for the Global Burden of Disease Study 2016. *The Lancet*, 390(10100), 1211-1259. doi:[https://doi.org/10.1016/S0140-6736\(17\)32154-2](https://doi.org/10.1016/S0140-6736(17)32154-2)

- Wall, BA (2000) *Social adjustment and perception of disease severity in children with juvenile rheumatoid arthritis*. ProQuest Dissertations Publishing. Retrieved from <http://search.proquest.com/docview/304546925/>
- Wallace, D (2009) *Pain self-efficacy, coping behavior, somatic symptoms, and disability in young adults with headache: A path analysis*. ProQuest Dissertations Publishing. Retrieved from <http://search.proquest.com/docview/304819284/>
- Walters, AS & Williamson, GM (1999) The role of activity restriction in the association between pain and depression: A study of pediatric patients with chronic pain. *Children's Health Care*, 28(1), 33-50.  
doi:10.1207/s15326888chc2801\_3
- Wand, BM, Abbaszadeh, S, Smith, AJ, Catley, MJ & Moseley, GL (2013) Acupuncture applied as a sensory discrimination training tool decreases movement-related pain in patients with chronic low back pain more than acupuncture alone: a randomised cross-over experiment. *British Journal of Sports Medicine*, 47(17), 1085-1089. doi:10.1136/bjsports-2013-092949
- Wicksell, RK, Olsson, GL & Hayes, SC (2011) Mediators of change in acceptance and commitment therapy for pediatric chronic pain. *PAIN*, 152(12), 2792-2801.
- Wong, RK, Yang, C, Song, GH, Wong, J & Ho, KY (2015) Melatonin regulation as a possible mechanism for probiotic (VSL#3) in irritable bowel syndrome: a randomized double-blinded placebo study. *Digestive Diseases & Sciences*, 60(1), 186-194. doi:10.1007/s10620-014-3299-8
- Yang, M, Chen, X, Bo, L, Lao, L, Chen, J, Yu, S, Yu, Z, Tang, H, Yi, L, Wu, X, et al. (2017) Moxibustion for pain relief in patients with primary dysmenorrhea: A randomized controlled trial. *PLoS ONE*, 12(2), e0170952.  
doi:10.1371/journal.pone.0170952
- Yang, W-Y, Liu, T-F, Chen, X-J, Guo, Y, Li, T, Qi, B-Q, Liu, F, Chang, L-X, Ruan, M & Liu, X-M (2020) Pharmacokinetics and pharmacodynamics of pegylated recombinant human granulocyte colony-stimulating factor in children with acute lymphoblastic leukemia: a prospective control trial. *Zhongguo Dang dai er ke za zhi= Chinese Journal of Contemporary Pediatrics*, 22(11), 1172-1177.
- Zeidan, F, Adler-Neal, AL, Wells, RE, Stagnaro, E, May, LM, Eisenach, JC, McHaffie, JG & Coghill, RC (2016) Mindfulness-Meditation-Based Pain Relief Is Not Mediated by Endogenous Opioids. *Journal of Neuroscience*, 36(11), 3391-3397.  
doi:10.1523/JNEUROSCI.4328-15.2016
- Ziadni, MS, You, DS, Johnson, L, Lumley, MA & Darnall, BD (2020) Emotions matter: The role of emotional approach coping in chronic pain. *European Journal of Pain*, 24(9), 1775-1784.
- Zinman, LH, Sutton, D, Ng, E, Nwe, P, Ngo, M & Bril, V (2005) A pilot study to compare the use of the Excorim staphylococcal protein immunoadsorption system and IVIG in chronic inflammatory demyelinating polyneuropathy. *Transfusion and apheresis science*, 33(3), 317-324. doi:10.1016/j.transci.2005.07.010
